# Supplementary material for: Computational analysis of kinase inhibitor selectivity using structural knowledge
Source: Oxford University Press journal article supplement (doi:10.1093/bioinformatics/bty582), 2018-07-06
Supplement: bioinformatics_35_2_235_s2.xlsx [file bioinformatics_35_2_235_s2.xlsx]

## Sheet: kinase_distribution
Gene Names	Uniprot IDs	Structure Counts
ABL	P00519	26
ACVR1	Q04771	7
ACVR2B	Q13705	3
AKT1	P31749	15
AKT2	P31751	11
ALK	Q9UM73	47
ARG	P42684	3
ASK1	Q99683	8
AURKA	O14965	110
AURKB	Q96GD4	1
BMPR1A	P36894	1
BMX	P51813	2
BRAF	P15056	57
BRK	Q13882	2
BTK	Q06187	33
CAMK1D	Q8IU85	1
CAMK1	Q14012	3
CAMK2A	Q9UQM7	2
CAMK2B	Q13554	1
CAMK2D	Q13557	2
CAMK4	Q16566	1
CAMKK2	Q96RR4	1
CDC42BPB	Q9Y5S2	4
CDK1	P06493	3
CDK2	P24941	229
CDK5	Q00535	4
CDK7	P50613	1
CDK8	P49336	20
CDK9	P50750	15
CHK1	O14757	113
CHK2	O96017	34
CLK1	P49759	4
CLK2	P49760	1
CLK3	P49761	4
COT	P41279	3
CSF1R	P07333	17
CSK	P41240	2
CSNK1D	P48730	15
CSNK1E	P49674	2
CSNK1G1	Q9HCP0	1
CSNK1G3	Q9Y6M4	9
CSNK2A1	P68400	64
CSNK2A2	P19784	4
DAPK1	P53355	44
DDR1	Q08345	9
DMPK	Q09013	1
DYRK1A	Q13627	19
EGFR	P00533	108
EPHA2	P29317	4
EPHA3	P29320	21
EPHA4	P54764	6
EPHA5	P54756	1
EPHA7	Q15375	3
EPHA8	P29322	1
EPHB1	P54762	1
EPHB2	P29323	1
EPHB3	P54753	3
EPHB4	P54760	15
ERBB2	P04626	7
ERBB4	Q15303	5
ERK1	P27361	2
ERK2	P28482	60
FAK2	Q14289	9
FAK	Q05397	18
FES	P07332	4
FGFR1	P11362	34
FGFR2	P21802	20
FGFR3	P22607	1
FGFR4	P22455	12
FLT1	P17948	1
FLT3	P36888	3
FLT4	P35916	2
FYN	P06241	1
GCK	P35557	28
GRK2	P25098	7
GRK4	P32298	1
GRK5	P34947	2
GRK6	P43250	3
GSG2	Q8TF76	8
GSK3B	P49841	69
HCK	P08631	19
HYL	P42679	1
IGF1R	P08069	19
IKBKB	O14920	1
INSR	P06213	23
IRAK4	Q9NWZ3	14
ITK	Q08881	31
JAK1	P23458	9
JAK2	O60674	27
JAK3	P52333	8
JNK2	P45984	2
JNK3	P53779	44
KDR	P35968	37
KIT	P10721	10
LCK	P06239	36
LIMK1	P53667	4
LIMK2	P53671	2
LRRK2	Q5S007	2
LYN	P07948	1
MAPK11	Q15759	3
MAPK12	P53778	1
MAPK13	O15264	4
MAPK14	Q16539	198
MAPKAPK2	P49137	22
MAPKAPK3	Q16644	4
MARK1	Q9P0L2	1
MARK2	Q7KZI7	1
MARK4	Q96L34	1
MEK1	Q02750	40
MEK2	P36507	2
MEKK3	Q99759	1
MELK	Q14680	16
MER	Q12866	7
MET	P08581	55
MKK6	P52564	4
MKNK1	Q9BUB5	2
MKNK2	Q9HBH9	3
MLK1	P80192	1
MLK2	Q02779	1
MSK1	O75582	1
MST1	P26927	1
MST2	Q13188	3
MST3	Q9Y6E0	25
MST4	Q9P289	4
NEK1	Q96PY6	2
NEK2	P51955	19
NEK7	Q8TDX7	2
NIK	Q99558	4
PAK1	Q13153	20
PAK4	O96013	15
PAK6	Q9NQU5	3
PASK	Q96RG2	1
PDGFRA	P16234	1
PDGFRB	P09619	1
PDK1	O15530	62
PDK1	Q15118	3
PHKG2	P15735	1
PI4KB	Q9UBF8	4
PIK3C2A	O00443	3
PIK3C3	Q8NEB9	9
PIK3CG	P48736	82
PIM1	P11309	108
PIM2	Q9P1W9	1
PKD2	Q13563	2
PLK1	P53350	30
PLK2	Q9NYY3	5
PLK3	Q9H4B4	1
PRKAA1	Q13131	3
PRKAA2	P54646	6
PRKACA	P17612	29
PRKCB	P05771	1
PRKCG	P05129	1
PRKCH	P24723	1
PRKCI	P41743	7
PRKCQ	Q04759	5
RET	P07949	11
RIPK2	O43353	8
ROCK1	Q13464	12
ROCK2	O75116	2
RON	Q04912	3
ROS	P08922	2
RPS6KB1	P23443	18
RSK1	Q15418	5
RSK2	P51812	5
SGK1	O00141	3
SLK	Q9H2G2	5
SPHK1	Q9NYA1	4
SRC	P12931	14
SRM	P19623	5
SRPK1	Q96SB4	4
SRPK2	P78362	1
STK16	O75716	1
SYK	P43405	56
TAK1	O43318	11
TBK1	Q9UHD2	9
TEC	P42680	1
TGFBR1	P36897	26
TIE2	Q02763	8
TNK2	Q07912	5
TRKA	P04629	9
TRKB	Q16620	3
TRKC	Q16288	2
TTK	P33981	48
TYK2	P29597	11
WEE1	P30291	8
YSK1	O00506	2
ZAK	Q9NYL2	1
ZAP70	P43403	6
ZIPK	O43293	5
Total		2857
