# Supplementary material for: Computational analysis of kinase inhibitor selectivity using structural knowledge
Source: Oxford University Press journal article supplement (doi:10.1093/bioinformatics/bty582), 2018-07-06
Supplement: bioinformatics_35_2_235_s3.xlsx [file bioinformatics_35_2_235_s3.xlsx]

## Sheet: Sheet1
Number	Compound	PDB ID	logKd	PFS	TP	TN	FN	FP	Total	Accuracy	Sensitivity	Specificity
1	dasatinib	2GQG	2	-3	25	35	1	103	164	0.365854	0.961538	0.253623
2	imatinib	2HYY/3GVU/1T46/3HEC/2PL0/1XBB	2	-3	6	59	0	99	164	0.396341	1	0.373418
3	sorafenib	3HEG	2	-3	7	86	1	70	164	0.567073	0.875	0.551282
4	staurosporine	1NVR	2	-3	82	19	12	51	164	0.615854	0.87234	0.271429
5	VX-745	3FC1	2	-3	2	98	0	64	164	0.609756	1	0.604938
6	SB-203580	1A9U	2	-3	6	43	0	115	164	0.29878	1	0.272152
7	BIRB-796	1KV2	2	-3	5	104	2	53	164	0.664634	0.714286	0.66242
8	lapatinib	1XKK	2	-3	3	103	0	58	164	0.646341	1	0.639752
9	gefitinib	2ITY	2	-3	2	51	0	111	164	0.323171	1	0.314815
10	erlotinib	1M17	2	-3	4	32	0	128	164	0.219512	1	0.2
11	flavorpiridol	3BLR	2	-3	3	19	0	142	164	0.134146	1	0.118012
12	roscovitine	2A4L	2	-3	0	25	0	139	164	0.152439	0	0.152439
13	LY-333531	1UU3	2	-3	1	38	0	125	164	0.237805	1	0.233129
14	VX-680	3E5A	2	-3	13	30	1	120	164	0.262195	0.928571	0.2
15	sunitinib	3G0E	2	-3	8	42	0	114	164	0.304878	1	0.269231
									Average	0.386585	0.890116	0.341109
1	dasatinib	2GQG	2	-4	22	103	4	35	164	0.762195	0.846154	0.746377
2	imatinib	2HYY/3GVU/1T46/3HEC/2PL0/1XBB	2	-4	6	126	0	32	164	0.804878	1	0.797468
3	sorafenib	3HEG	2	-4	3	131	5	25	164	0.817073	0.375	0.839744
4	staurosporine	1NVR	2	-4	50	47	44	23	164	0.591463	0.531915	0.671429
5	VX-745	3FC1	2	-4	2	155	0	7	164	0.957317	1	0.95679
6	SB-203580	1A9U	2	-4	4	124	2	34	164	0.780488	0.666667	0.78481
7	BIRB-796	1KV2	2	-4	4	143	3	14	164	0.896341	0.571429	0.910828
8	lapatinib	1XKK	2	-4	3	156	0	5	164	0.969512	1	0.968944
9	gefitinib	2ITY	2	-4	2	125	0	37	164	0.77439	1	0.771605
10	erlotinib	1M17	2	-4	2	99	2	61	164	0.615854	0.5	0.61875
11	flavorpiridol	3BLR	2	-4	3	87	0	74	164	0.54878	1	0.540373
12	roscovitine	2A4L	2	-4	0	92	0	72	164	0.560976	0	0.560976
13	LY-333531	1UU3	2	-4	1	103	0	60	164	0.634146	1	0.631902
14	VX-680	3E5A	2	-4	6	106	8	44	164	0.682927	0.428571	0.706667
15	sunitinib	3G0E	2	-4	7	114	1	42	164	0.737805	0.875	0.730769
									Average	0.742276	0.719649	0.749162
1	dasatinib	2GQG	2	-5	11	135	15	3	164	0.890244	0.423077	0.978261
2	imatinib	2HYY/3GVU/1T46/3HEC/2PL0/1XBB	2	-5	6	153	0	5	164	0.969512	1	0.968354
3	sorafenib	3HEG	2	-5	1	149	7	7	164	0.914634	0.125	0.955128
4	staurosporine	1NVR	2	-5	9	67	85	3	164	0.463415	0.0957447	0.957143
5	VX-745	3FC1	2	-5	2	160	0	2	164	0.987805	1	0.987654
6	SB-203580	1A9U	2	-5	2	154	4	4	164	0.95122	0.333333	0.974684
7	BIRB-796	1KV2	2	-5	2	154	5	3	164	0.95122	0.285714	0.980892
8	lapatinib	1XKK	2	-5	3	161	0	0	164	1	1	1
9	gefitinib	2ITY	2	-5	1	156	1	6	164	0.957317	0.5	0.962963
10	erlotinib	1M17	2	-5	1	142	3	18	164	0.871951	0.25	0.8875
11	flavorpiridol	3BLR	2	-5	1	153	2	8	164	0.939024	0.333333	0.950311
12	roscovitine	2A4L	2	-5	0	160	0	4	164	0.97561	0	0.97561
13	LY-333531	1UU3	2	-5	0	154	1	9	164	0.939024	0	0.944785
14	VX-680	3E5A	2	-5	2	136	12	14	164	0.841463	0.142857	0.906667
15	sunitinib	3G0E	2	-5	4	153	4	3	164	0.957317	0.5	0.980769
									Average	0.907317	0.399271	0.960715
1	dasatinib	2GQG	3	-3	35	34	2	93	164	0.420732	0.945946	0.267717
2	imatinib	2HYY/3GVU/1T46/3HEC/2PL0/1XBB	3	-3	7	59	0	98	164	0.402439	1	0.375796
3	sorafenib	3HEG	3	-3	14	80	7	63	164	0.573171	0.666667	0.559441
4	staurosporine	1NVR	3	-3	111	10	21	22	164	0.737805	0.840909	0.3125
5	VX-745	3FC1	3	-3	3	98	0	63	164	0.615854	1	0.608696
6	SB-203580	1A9U	3	-3	10	42	1	111	164	0.317073	0.909091	0.27451
7	BIRB-796	1KV2	3	-3	15	100	6	43	164	0.70122	0.714286	0.699301
8	lapatinib	1XKK	3	-3	3	103	0	58	164	0.646341	1	0.639752
9	gefitinib	2ITY	3	-3	8	49	2	105	164	0.347561	0.8	0.318182
10	erlotinib	1M17	3	-3	15	32	0	117	164	0.286585	1	0.214765
11	flavorpiridol	3BLR	3	-3	17	19	0	128	164	0.219512	1	0.129252
12	roscovitine	2A4L	3	-3	2	24	1	137	164	0.158537	0.666667	0.149068
13	LY-333531	1UU3	3	-3	16	37	1	110	164	0.323171	0.941176	0.251701
14	VX-680	3E5A	3	-3	38	23	8	95	164	0.371951	0.826087	0.194915
15	sunitinib	3G0E	3	-3	15	36	6	107	164	0.310976	0.714286	0.251748
									Average	0.428862	0.868341	0.349823
1	dasatinib	2GQG	3	-4	28	98	9	29	164	0.768293	0.756757	0.771654
2	imatinib	2HYY/3GVU/1T46/3HEC/2PL0/1XBB	3	-4	6	125	1	32	164	0.79878	0.857143	0.796178
3	sorafenib	3HEG	3	-4	8	123	13	20	164	0.79878	0.380952	0.86014
4	staurosporine	1NVR	3	-4	64	23	68	9	164	0.530488	0.484848	0.71875
5	VX-745	3FC1	3	-4	2	154	1	7	164	0.95122	0.666667	0.956522
6	SB-203580	1A9U	3	-4	6	121	5	32	164	0.77439	0.545455	0.79085
7	BIRB-796	1KV2	3	-4	9	134	12	9	164	0.871951	0.428571	0.937063
8	lapatinib	1XKK	3	-4	3	156	0	5	164	0.969512	1	0.968944
9	gefitinib	2ITY	3	-4	5	120	5	34	164	0.762195	0.5	0.779221
10	erlotinib	1M17	3	-4	11	97	4	52	164	0.658537	0.733333	0.651007
11	flavorpiridol	3BLR	3	-4	15	85	2	62	164	0.609756	0.882353	0.578231
12	roscovitine	2A4L	3	-4	1	90	2	71	164	0.554878	0.333333	0.559006
13	LY-333531	1UU3	3	-4	6	92	11	55	164	0.597561	0.352941	0.62585
14	VX-680	3E5A	3	-4	16	84	30	34	164	0.609756	0.347826	0.711864
15	sunitinib	3G0E	3	-4	9	103	12	40	164	0.682927	0.428571	0.72028
									Average	0.729268	0.579917	0.761704
1	dasatinib	2GQG	3	-5	12	125	25	2	164	0.835366	0.324324	0.984252
2	imatinib	2HYY/3GVU/1T46/3HEC/2PL0/1XBB	3	-5	6	152	1	5	164	0.963415	0.857143	0.968153
3	sorafenib	3HEG	3	-5	4	139	17	4	164	0.871951	0.190476	0.972028
4	staurosporine	1NVR	3	-5	10	30	122	2	164	0.243902	0.0757576	0.9375
5	VX-745	3FC1	3	-5	2	159	1	2	164	0.981707	0.666667	0.987578
6	SB-203580	1A9U	3	-5	2	149	9	4	164	0.920732	0.181818	0.973856
7	BIRB-796	1KV2	3	-5	2	140	19	3	164	0.865854	0.0952381	0.979021
8	lapatinib	1XKK	3	-5	3	161	0	0	164	1	1	1
9	gefitinib	2ITY	3	-5	3	150	7	4	164	0.932927	0.3	0.974026
10	erlotinib	1M17	3	-5	6	136	9	13	164	0.865854	0.4	0.912752
11	flavorpiridol	3BLR	3	-5	7	145	10	2	164	0.926829	0.411765	0.986395
12	roscovitine	2A4L	3	-5	0	157	3	4	164	0.957317	0	0.975155
13	LY-333531	1UU3	3	-5	2	140	15	7	164	0.865854	0.117647	0.952381
14	VX-680	3E5A	3	-5	3	105	43	13	164	0.658537	0.0652174	0.889831
15	sunitinib	3G0E	3	-5	4	140	17	3	164	0.878049	0.190476	0.979021
									Average	0.85122	0.325102	0.964797
1	dasatinib	2GQG	4	-3	49	33	3	79	164	0.5	0.942308	0.294643
2	imatinib	2HYY/3GVU/1T46/3HEC/2PL0/1XBB	4	-3	14	56	3	91	164	0.426829	0.823529	0.380952
3	sorafenib	3HEG	4	-3	28	74	13	49	164	0.621951	0.682927	0.601626
4	staurosporine	1NVR	4	-3	121	7	24	12	164	0.780488	0.834483	0.368421
5	VX-745	3FC1	4	-3	10	98	0	56	164	0.658537	1	0.636364
6	SB-203580	1A9U	4	-3	25	40	3	96	164	0.396341	0.892857	0.294118
7	BIRB-796	1KV2	4	-3	26	94	12	32	164	0.731707	0.684211	0.746032
8	lapatinib	1XKK	4	-3	5	103	0	56	164	0.658537	1	0.647799
9	gefitinib	2ITY	4	-3	13	47	4	100	164	0.365854	0.764706	0.319728
10	erlotinib	1M17	4	-3	27	30	2	105	164	0.347561	0.931034	0.222222
11	flavorpiridol	3BLR	4	-3	37	17	2	108	164	0.329268	0.948718	0.136
12	roscovitine	2A4L	4	-3	9	24	1	130	164	0.20122	0.9	0.155844
13	LY-333531	1UU3	4	-3	30	36	2	96	164	0.402439	0.9375	0.272727
14	VX-680	3E5A	4	-3	72	22	9	61	164	0.573171	0.888889	0.26506
15	sunitinib	3G0E	4	-3	34	35	7	88	164	0.420732	0.829268	0.284553
									Average	0.494309	0.870695	0.375073
1	dasatinib	2GQG	4	-4	36	91	16	21	164	0.77439	0.692308	0.8125
2	imatinib	2HYY/3GVU/1T46/3HEC/2PL0/1XBB	4	-4	6	115	11	32	164	0.737805	0.352941	0.782313
3	sorafenib	3HEG	4	-4	16	111	25	12	164	0.77439	0.390244	0.902439
4	staurosporine	1NVR	4	-4	70	16	75	3	164	0.52439	0.482759	0.842105
5	VX-745	3FC1	4	-4	3	148	7	6	164	0.920732	0.3	0.961039
6	SB-203580	1A9U	4	-4	12	110	16	26	164	0.743902	0.428571	0.808824
7	BIRB-796	1KV2	4	-4	15	123	23	3	164	0.841463	0.394737	0.97619
8	lapatinib	1XKK	4	-4	3	154	2	5	164	0.957317	0.6	0.968553
9	gefitinib	2ITY	4	-4	8	116	9	31	164	0.756098	0.470588	0.789116
10	erlotinib	1M17	4	-4	19	91	10	44	164	0.670732	0.655172	0.674074
11	flavorpiridol	3BLR	4	-4	27	75	12	50	164	0.621951	0.692308	0.6
12	roscovitine	2A4L	4	-4	7	89	3	65	164	0.585366	0.7	0.577922
13	LY-333531	1UU3	4	-4	9	80	23	52	164	0.542683	0.28125	0.606061
14	VX-680	3E5A	4	-4	30	63	51	20	164	0.567073	0.37037	0.759036
15	sunitinib	3G0E	4	-4	17	91	24	32	164	0.658537	0.414634	0.739837
									Average	0.711789	0.481726	0.786667
1	dasatinib	2GQG	4	-5	12	110	40	2	164	0.743902	0.230769	0.982143
2	imatinib	2HYY/3GVU/1T46/3HEC/2PL0/1XBB	4	-5	6	142	11	5	164	0.902439	0.352941	0.965986
3	sorafenib	3HEG	4	-5	4	119	37	4	164	0.75	0.097561	0.96748
4	staurosporine	1NVR	4	-5	12	19	133	0	164	0.189024	0.0827586	1
5	VX-745	3FC1	4	-5	2	152	8	2	164	0.939024	0.2	0.987013
6	SB-203580	1A9U	4	-5	3	133	25	3	164	0.829268	0.107143	0.977941
7	BIRB-796	1KV2	4	-5	4	125	34	1	164	0.786585	0.105263	0.992063
8	lapatinib	1XKK	4	-5	3	159	2	0	164	0.987805	0.6	1
9	gefitinib	2ITY	4	-5	5	145	12	2	164	0.914634	0.294118	0.986395
10	erlotinib	1M17	4	-5	9	125	20	10	164	0.817073	0.310345	0.925926
11	flavorpiridol	3BLR	4	-5	7	123	32	2	164	0.792683	0.179487	0.984
12	roscovitine	2A4L	4	-5	2	152	8	2	164	0.939024	0.2	0.987013
13	LY-333531	1UU3	4	-5	4	127	28	5	164	0.79878	0.125	0.962121
14	VX-680	3E5A	4	-5	7	74	74	9	164	0.493902	0.0864198	0.891566
15	sunitinib	3G0E	4	-5	6	122	35	1	164	0.780488	0.146341	0.99187
									Average	0.777642	0.207876	0.973434
