# Supplementary material for: Computational analysis of kinase inhibitor selectivity using structural knowledge
Source: Oxford University Press journal article supplement (doi:10.1093/bioinformatics/bty582), 2018-07-06
Supplement: bioinformatics_35_2_235_s4.xlsx [file bioinformatics_35_2_235_s4.xlsx]

## Sheet: Sheet1
						PocketFEATURE			BSS
Compound	Number	Primary Target	Co-crystal Target	PDB ID	Accuracy	Sensitivity	Specificity	Accuracy	Sensitivity	Specificity
dasatinib	1	EPHA3	ABL1	2GQG	0.89	0.42	0.98	0.88	0.63	0.93
imatinib	2	DDR1	ABL1/ABL2/cKIT/P38A/LCK/SYK	2HYY/3GVU/1T46/3HEC/2PL0/1XBB	0.97	1	0.97	0.94	0.69	0.91
sorafenib	3	DDR1	P38A	3HEG	0.91	0.13	0.96	0.87	0.21	0.91
staurosporine	4	SLK	CHK1	INVR	0.46	0.1	0.96	0.62	0.47	0.86
VX-745	5	P38A	P38A	3FC1	0.99	1	0.99	1	1	1
SB-203580	6	P38A	P38A	1A9U	0.95	0.33	0.97	0.97	0.38	0.99
BIRB-796	7	P38A	P38A	1KV2	0.95	0.29	0.98	0.96	0.44	0.98
lapatinib	8	EGFR	EGFR	1XKK	1	1	1	1	1	1
gefitinib	9	EGFR	EGFR	2ITY	0.96	0.5	0.96	0.8	1	0.8
erlotinib	10	EGFR	EGFR	1M17	0.87	0.25	0.89	0.94	0..25	0.95
flavorpiridol	11	CDK9	CDK9	3BLR	0.94	0.33	0.95	0.96	0.17	0.97
roscovitine	12	CSNK1D	CDK2	2A4L	0.98	0	0.98	0.99	0	0.99
LY-333531	13	PRKCQ	PDK1	1UU3	0.94	0	0.94	0.79	0.6	0.79
VX-680	14	ABL2	AURA	3E5A	0.84	0.14	0.91	0.94	0.14	1
sunitinib	15	PDGFRb	KIT	3G0E	0.96	0.5	0.98	0.43	0.77	0.35
				Average	0.91	0.4	0.96	0.87	0.54	0.89
