# Supplementary material for: Computational analysis of kinase inhibitor selectivity using structural knowledge
Source: Oxford University Press journal article supplement (doi:10.1093/bioinformatics/bty582), 2018-07-06
Supplement: bioinformatics_35_2_235_s5.xlsx [file bioinformatics_35_2_235_s5.xlsx]

## Sheet: pocket_heatmap
Name	ABL1	ACK	AKT1	AKT2	ALK	AurA	BMPR2	CaMK1a	CDK2	CDK7	CDK9	CHK1	DAPK1	EGFR	EphA2	EphA3	ErbB3	Erk2	Erk5	FGFR2	FGFR3	GSK3B	HGK	IGF1R	INSR	ITK	JAK2-b	JNK1	JNK3	KIT	LCK	LIMK1	MAP2K1	MAPKAPK2	MELK	MER	MET	MRCKb	MST2	MST3	p38g	PAK1	PAK4	PDK1	PIM1	PKACa	PKR	PLK1	RET
ABL1	-9.6	0	0	0	0	0	0	0	0	0	-5.022	0	0	0	-5.478	-5.183	0	0	0	-5.846	-5.245	0	0	0	0	0	0	0	0	0	-5.939	0	0	0	0	0	0	0	0	-5.307	0	0	0	0	0	0	0	0	0
ACK	0	-10.8	0	0	0	0	0	0	0	0	0	0	0	-5.359	0	0	0	0	0	-5.106	-5.359	-5.136	0	0	0	0	0	0	0	0	0	0	0	0	0	0	0	0	0	0	0	0	0	0	0	0	0	0	-5.304
AKT1	0	0	-16.2	-12.322	0	0	-5.243	0	0	0	0	0	0	0	0	0	0	0	0	0	0	-5.919	0	0	0	0	0	0	0	0	0	0	0	0	0	0	0	-5.962	0	-5.482	0	0	-5.269	0	0	-8.45	0	0	0
AKT2	0	0	-12.322	-15.6	0	0	0	0	0	0	0	0	0	0	0	0	0	0	0	0	-5.427	-6.298	0	0	0	0	0	0	0	0	0	0	0	0	-5.348	0	0	-6.525	0	-5.887	0	0	-6.09	0	0	-9.597	0	0	0
ALK	0	0	0	0	-8.4	0	0	0	0	0	0	0	0	0	0	0	0	0	0	0	0	0	0	0	0	0	0	0	0	0	0	0	0	0	0	0	0	0	0	0	0	0	0	0	0	0	0	0	0
AurA	0	0	0	0	0	-8.4	0	0	0	0	0	0	0	0	0	0	0	0	0	-5.412	-6.004	-5.396	0	0	0	0	0	0	0	0	0	0	0	0	0	0	0	0	0	0	0	0	0	0	0	0	0	0	-5.39
BMPR2	0	0	-5.243	0	0	0	-12	0	0	0	0	0	0	0	0	0	0	0	0	0	0	0	0	0	0	0	0	0	0	0	0	0	0	0	0	0	0	-5.609	0	-6.031	0	0	-5.659	0	0	-5.539	0	0	-5.741
CaMK1a	0	0	0	0	0	0	0	-11.4	0	0	0	0	-5.153	0	0	0	0	0	0	0	0	0	0	0	0	0	0	-5.289	0	0	0	0	0	-5.88	0	0	0	0	-5.032	0	0	0	0	0	0	0	0	0	0
CDK2	0	0	0	0	0	0	0	0	-13.8	-5.239	-5.635	0	0	0	0	0	0	-5.195	0	0	0	-6.509	-5.284	0	0	0	0	0	0	0	0	0	0	0	-5.196	0	0	-5.279	0	-6.165	-5.587	0	-5.066	-5.07	0	0	0	-5.355	-5.092
CDK7	0	0	0	0	0	0	0	0	-5.239	-13.2	-5.341	0	0	0	0	0	0	0	0	0	0	0	-5.296	0	0	0	0	0	0	0	0	0	0	0	0	0	0	0	0	0	0	0	0	0	0	0	0	0	0
CDK9	-5.022	0	0	0	0	0	0	0	-5.635	-5.341	-10.8	0	0	0	0	0	0	0	0	0	0	-5.439	0	0	0	0	0	0	0	0	0	0	0	0	0	0	-5.158	-5.135	0	-5.475	-5.296	0	0	0	0	0	0	0	0
CHK1	0	0	0	0	0	0	0	0	0	0	0	-13.2	0	0	0	0	0	0	0	0	0	0	0	0	0	0	0	0	0	0	0	0	0	0	0	0	0	0	0	0	0	0	0	0	0	-5.139	0	0	-5.197
DAPK1	0	0	0	0	0	0	0	-5.153	0	0	0	0	-11.4	0	0	0	0	0	0	0	0	0	0	0	0	0	0	0	0	0	0	0	0	0	-5.693	0	0	0	0	-5.211	0	0	0	0	-5.092	0	0	0	0
EGFR	0	-5.359	0	0	0	0	0	0	0	0	0	0	0	-13.2	0	0	-5.984	0	0	-5.321	-5.387	-5.63	0	0	-5.09	-5.81	-5.162	0	0	0	0	0	-5.137	0	0	0	-6.218	0	0	0	0	0	0	0	0	0	0	0	0
EphA2	-5.478	0	0	0	0	0	0	0	0	0	0	0	0	0	-10.2	-6.438	0	0	0	0	0	0	0	0	0	0	0	0	0	0	-5.667	0	0	0	0	0	0	0	0	0	0	-5.042	0	-5.135	0	0	0	0	0
EphA3	-5.183	0	0	0	0	0	0	0	0	0	0	0	0	0	-6.438	-12	0	0	0	0	0	0	0	0	0	0	0	0	0	0	-5.877	0	0	0	0	0	0	0	0	0	0	0	0	0	0	0	0	0	0
ErbB3	0	0	0	0	0	0	0	0	0	0	0	0	0	-5.984	0	0	-13.2	0	0	-5.315	-5.695	0	0	0	0	0	0	0	0	0	0	-5.148	0	0	0	0	-5.307	0	0	0	0	0	0	0	0	0	0	0	0
Erk2	0	0	0	0	0	0	0	0	-5.195	0	0	0	0	0	0	0	0	-15	-7.874	0	0	-6.201	0	0	0	0	0	-6.495	-5.035	0	0	0	-5.742	0	-5.833	0	0	0	0	0	-5.357	0	0	0	0	0	0	0	0
Erk5	0	0	0	0	-5.101	0	0	0	0	0	0	0	0	0	0	0	0	-7.874	-12	0	-5.28	-5.187	0	0	0	0	0	0	0	0	0	0	0	0	-5.967	0	0	0	0	0	0	0	0	0	0	0	0	0	0
FGFR2	-5.846	-5.106	0	0	0	-5.412	0	0	0	0	0	0	0	-5.321	0	0	-5.315	0	0	-13.2	-10.671	-6.277	-5.311	0	-5.285	0	0	0	0	-5.239	0	0	-5.029	0	-5.547	0	0	-5.222	0	-6.037	0	-5.326	-5.475	0	-5.158	-5.099	-5.455	0	-7.8
FGFR3	-5.245	-5.359	0	-5.427	0	-5.777	0	0	0	0	0	0	0	-5.387	0	0	-5.695	0	-5.28	-10.671	-13.2	-6.503	0	0	0	0	0	-5.045	0	-6.495	0	0	0	0	-5.427	0	0	0	-5.69	-5.946	0	0	-6.509	-5.643	0	-5.1	0	0	-7.803
GSK3B	0	-5.136	-5.919	-6.298	0	-5.396	0	0	-6.509	0	-5.439	0	0	-5.63	0	0	0	-6.201	-5.187	-6.277	-6.503	-15	-5.228	0	0	0	0	0	0	-5.747	0	0	-5.413	0	-6.363	0	0	-5.803	0	-6.892	-5.919	0	-5.544	-5.846	-5.192	-6.821	0	-5.572	-5.799
HGK	0	0	0	0	0	0	0	0	-5.284	-5.296	0	0	0	0	0	0	0	0	0	-5.311	0	-5.228	-13.8	0	0	0	0	0	0	0	0	0	-6.098	0	0	0	0	0	-5.961	-5.902	0	0	0	0	0	0	-5.632	0	0
IGF1R	0	0	0	0	0	0	0	0	0	0	0	0	0	0	0	0	0	0	0	0	0	0	0	-9	-6.109	0	0	0	0	0	0	0	0	0	0	0	0	0	0	0	0	0	0	0	0	0	0	0	0
INSR	0	0	0	0	0	0	0	0	0	0	0	0	0	-5.09	0	0	0	0	0	-5.285	0	0	0	-6.109	-14.4	0	0	0	0	-5.005	0	0	-5.601	0	0	0	-5.834	0	-5.532	0	0	0	0	0	0	0	0	0	0
ITK	0	0	0	0	0	0	0	0	0	0	0	0	0	-5.81	0	0	0	0	0	0	0	0	0	0	0	-10.2	0	0	0	0	0	0	-5.289	0	0	0	0	0	0	0	0	0	0	0	0	0	0	0	0
JAK2-b	0	0	0	0	0	0	0	0	0	0	0	0	0	-5.162	0	0	0	0	0	0	0	0	0	0	0	0	-14.4	0	0	0	0	0	0	0	0	0	0	0	0	0	0	0	0	0	0	0	0	0	0
JNK1	0	0	0	0	0	0	0	-5.289	0	0	0	0	0	0	0	0	0	-6.495	0	0	-5.045	0	0	0	0	0	0	-11.4	-7.617	0	0	0	-6.345	0	0	0	0	0	0	0	0	0	0	0	0	0	0	0	0
JNK3	0	0	0	0	0	0	0	0	0	0	0	0	0	0	0	0	0	-5.035	0	0	0	0	0	0	0	0	0	-7.617	-10.8	0	0	0	-5.259	0	0	0	0	0	0	0	0	0	0	0	0	0	0	0	0
KIT	0	0	0	0	0	0	0	0	0	0	0	0	0	0	0	0	0	0	0	-5.239	-6.495	-5.747	0	0	-5.005	0	0	0	0	-13.8	0	0	0	0	0	0	0	0	0	0	0	0	0	0	0	0	0	0	-5.713
LCK	-5.939	0	0	0	0	0	0	0	0	0	0	0	0	0	-5.667	-5.877	0	0	0	0	0	0	0	0	0	0	0	0	0	0	-9.6	0	0	0	0	0	0	0	0	0	0	0	0	0	0	0	0	0	0
LIMK1	0	0	0	0	0	0	0	0	0	0	0	0	0	0	0	0	-5.148	0	0	0	0	0	0	0	0	0	0	0	0	0	0	-7.8	0	0	0	0	0	0	0	0	0	0	0	0	0	0	0	0	0
MAP2K1	0	0	0	0	0	0	0	0	0	0	0	0	0	-5.137	0	0	0	-5.742	0	-5.029	0	-5.413	-6.098	0	-5.316	-5.289	0	-6.345	-5.259	0	0	0	-13.2	0	0	0	0	0	-5.93	0	0	-5.252	0	0	0	0	-5.076	0	0
MAPKAPK2	0	0	0	0	0	0	0	-5.88	0	0	0	0	0	0	0	0	0	0	0	0	0	0	0	0	0	0	0	0	0	0	0	0	0	-11.4	0	0	0	0	0	0	0	0	0	0	0	0	0	0	0
MELK	0	0	0	-5.348	0	0	0	0	-5.196	0	0	0	-5.693	0	0	0	0	-5.833	-5.967	-5.547	-5.427	-6.363	0	0	0	0	0	0	0	0	0	0	0	0	-13.8	0	0	-5.379	0	-5.138	0	0	-5.101	0	0	-5.874	-5.675	-5.244	0
MER	0	0	0	0	0	0	0	0	0	0	0	0	0	0	0	0	0	0	0	0	0	0	0	0	0	0	0	0	0	0	0	0	0	0	0	-9.6	-5.529	0	0	0	0	0	0	0	0	0	0	0	0
MET	0	0	0	0	0	0	0	0	0	0	-5.279	0	0	-6.218	0	0	-5.307	0	0	0	0	0	0	0	-5.834	0	0	0	0	0	0	0	0	0	0	-5.529	-13.2	0	0	0	0	0	0	0	0	0	0	0	0
MRCKb	0	0	-5.962	-6.525	0	0	-5.609	0	-5.279	0	-5.135	0	0	0	0	0	0	0	0	-5.222	0	-5.803	0	0	0	0	0	0	0	0	0	0	0	0	-5.379	0	0	-12.6	0	-6.935	0	0	-5.35	0	0	-5.783	0	0	0
MST2	0	0	0	0	0	0	0	-5.032	0	0	0	0	0	0	0	0	0	0	0	0	-5.69	0	-5.961	0	-5.532	0	0	0	0	0	0	0	-5.93	0	0	0	0	0	-13.8	-6.374	0	0	0	0	0	0	0	0	0
MST3	-5.307	0	-5.482	-5.887	0	0	-5.751	0	-6.165	0	-5.475	0	-5.211	0	0	0	0	0	0	-6.037	-5.946	-6.892	-5.902	0	0	0	0	0	0	0	0	0	0	0	-5.138	0	0	-6.935	-6.374	-12.6	0	0	-6.229	0	0	-5.386	0	0	-5.275
p38g	0	0	0	0	0	0	0	0	-5.587	0	-5.296	0	0	0	0	0	0	-5.357	0	0	0	-5.919	0	0	0	0	0	0	0	0	0	0	0	0	0	0	0	0	0	0	-13.2	0	-5.028	0	0	-5.467	0	-5.425	0
PAK1	0	0	0	0	0	0	0	0	0	0	0	0	0	0	-5.042	0	0	0	0	-5.326	0	0	0	0	0	0	0	0	0	0	0	0	-5.252	0	0	0	0	0	0	0	0	-13.8	-5.505	-5.055	0	0	0	0	-5.009
PAK4	0	0	-5.269	-6.09	0	0	-5.659	0	-5.066	0	0	0	0	0	0	0	0	0	0	-5.475	-6.509	-5.544	0	0	0	0	0	0	0	0	0	0	0	0	-5.101	0	0	-5.35	0	-6.229	-5.028	-5.505	-15	0	0	-6.496	0	0	0
PDK1	0	0	0	0	0	0	0	0	-5.07	0	0	0	0	0	-5.135	0	0	0	0	0	-5.261	-5.846	0	0	0	0	0	0	0	0	0	0	0	0	0	0	0	0	0	0	0	-5.055	0	-11.4	0	-5.101	0	0	0
PIM1	0	0	0	0	0	0	0	0	0	0	0	0	-5.092	0	0	0	0	0	0	-5.158	0	-5.192	0	0	0	0	0	0	0	0	0	0	0	0	0	0	0	0	0	0	0	0	0	0	-10.2	0	0	0	0
PKACa	0	0	-8.45	-9.597	0	0	-5.539	0	0	0	0	-5.139	0	0	0	0	0	0	0	-5.099	-5.1	-6.821	0	0	0	0	0	0	0	0	0	0	0	0	-5.874	0	0	-5.783	0	-5.386	-5.467	0	-6.496	-5.101	0	-17.4	0	0	-5.172
PKR	0	0	0	0	0	0	0	0	0	0	0	0	0	0	0	0	0	0	0	-5.455	0	0	-5.632	0	0	0	0	0	0	0	0	0	-5.076	0	-5.675	0	0	0	0	0	0	0	0	0	0	0	-12	0	0
PLK1	0	0	0	0	0	0	0	0	-5.355	0	0	0	0	0	0	0	0	0	0	0	0	-5.572	0	0	0	0	0	0	0	0	0	0	0	0	-5.244	0	0	0	0	0	-5.425	0	0	0	0	0	0	-12.6	0
RET	0	-5.304	0	0	0	-5.39	-5.741	0	-5.092	0	0	-5.197	0	0	0	0	0	0	0	-7.8	-7.803	-5.799	0	0	0	0	0	0	0	-5.713	0	0	0	0	0	0	0	0	0	-5.275	0	-5.009	0	0	0	-5.172	0	0	-12
RIPK2	0	0	0	0	0	0	-5.126	0	0	-5.007	0	0	0	0	0	-5.344	-5.503	0	0	-6.351	-6.682	-5.325	-5.717	0	0	0	0	0	0	0	0	0	0	0	0	0	0	0	0	-5.41	0	-5.277	0	0	0	-5.195	0	0	-5.331
RSK1	0	0	0	0	0	0	0	0	-5.249	0	0	0	0	0	0	0	0	0	0	-5.015	0	0	0	0	0	0	-5.091	0	0	0	0	0	0	0	0	0	0	0	0	-5.273	0	0	0	0	0	0	0	0	0
SRC	-6.878	-5.254	0	0	0	0	0	0	-5.09	-5.031	-5.573	0	0	-6.474	-6.164	-5.84	-6.721	0	0	-6.239	-7.281	-5.152	-5.536	0	-5.159	-5.901	-5.075	-5.039	0	0	-7.08	0	-6.497	0	0	0	-5.798	0	-5.34	-6.561	0	0	-5.449	0	0	0	0	0	-5.371
SYK	-5.15	0	0	0	0	0	-5.271	0	0	0	0	0	0	0	0	0	0	0	0	-5.372	0	0	0	0	0	0	0	0	0	0	0	0	-5.155	0	0	0	0	0	0	-5.484	0	0	-6.117	0	0	0	0	0	-5.574
TYK2	0	-6.801	-5.428	-5.326	0	-5.304	-5.988	0	0	0	0	-5.205	0	-5.027	0	0	-5.562	0	0	-7.424	-7.633	-6.104	-5.334	0	-5.343	-5.028	-5.12	0	0	0	0	0	-5.281	0	-5.496	0	-5.448	-5.054	-5.284	-5.989	-5.221	0	-6.007	0	0	-6.232	0	0	-7.047
ZAP70	0	0	0	0	0	0	0	-5.033	0	0	0	0	0	-5.488	0	0	0	0	0	-5.064	0	0	0	0	0	0	0	0	0	0	0	0	-5.804	0	0	0	0	0	0	0	0	0	0	0	0	0	0	0	0
[truncated: 6 more columns]
