# Supplementary material for: Computational analysis of kinase inhibitor selectivity using structural knowledge
Source: Oxford University Press journal article supplement (doi:10.1093/bioinformatics/bty582), 2018-07-06
Supplement: bioinformatics_35_2_235_s6.xlsx [file bioinformatics_35_2_235_s6.xlsx]

## Sheet: Supplementary_Table5
Name	ABL1	ACK	AKT1	AKT2	ALK	AurA	BMPR2	CaMK1a	CDK2	CDK7	CDK9	CHK1	DAPK1	EGFR	EphA2	EphA3	ErbB3	Erk2	Erk5	FGFR2	FGFR3	GSK3B	HGK	IGF1R	INSR	ITK	JAK2-b	JNK1	JNK3	KIT	LCK	LIMK1	MAP2K1	MAPKAPK2	MELK	MER	MET	MRCKb	MST2	MST3	p38g	PAK1	PAK4	PDK1	PIM1	PKACa	PKR	PLK1	RET
ABL1	100	41	0	0	39	0	0	0	0	0	0	0	0	39	41	40	0	0	0	40	38	0	0	38	40	38	35	0	0	0	45	0	0	0	0	44	41	0	0	0	0	0	0	0	0	0	0	0	0
ACK	41	100	0	0	36	0	0	0	0	0	0	0	0	40	38	37	39	0	0	36	37	0	0	0	36	37	41	0	0	41	40	0	0	0	0	38	37	0	0	0	0	0	0	0	0	0	0	0	0
AKT1	0	0	100	82	0	37	0	36	0	0	0	0	0	0	0	0	0	0	0	0	0	0	0	0	0	0	0	0	0	0	0	0	0	0	35	0	0	39	0	0	0	0	0	35	0	45	0	0	0
AKT2	0	0	82	100	0	36	0	38	0	0	0	0	0	0	0	0	0	0	0	0	0	0	0	0	0	0	0	0	0	0	0	0	0	0	0	0	0	39	0	0	0	0	0	35	0	43	0	0	0
ALK	38	36	0	0	100	0	0	0	0	0	0	0	0	0	0	0	0	0	0	37	38	0	0	39	38	39	0	0	0	0	40	0	0	0	0	38	38	0	0	0	0	0	0	0	0	0	0	0	0
AurA	0	0	37	36	0	100	0	0	0	0	0	0	0	0	0	0	0	0	0	0	0	0	0	0	0	0	0	0	0	0	0	0	0	0	0	0	0	35	0	0	0	0	0	0	0	0	0	0	0
BMPR2	0	0	0	0	0	0	100	0	0	0	0	0	0	0	0	0	0	0	0	0	0	0	0	0	0	0	0	0	0	0	0	0	0	0	0	0	0	0	0	0	0	0	0	0	0	0	0	0	0
CaMK1a	0	0	36	38	0	0	0	100	0	0	0	0	0	0	0	0	0	0	0	0	0	0	0	0	0	0	0	0	0	0	0	0	0	38	35	0	0	35	0	0	0	0	0	0	0	0	0	0	0
CDK2	0	0	0	0	0	0	0	0	100	45	40	0	0	0	0	0	0	37	39	0	0	0	0	0	0	0	0	36	36	0	0	0	0	0	0	0	0	0	0	35	37	0	0	0	0	0	0	0	0
CDK7	0	0	0	0	0	0	0	0	45	100	41	0	0	0	0	0	0	39	35	0	0	38	0	0	0	0	0	0	0	0	0	0	0	0	0	0	0	0	0	0	36	0	0	0	0	0	0	0	0
CDK9	0	0	0	0	0	0	0	0	40	41	100	0	0	0	0	0	0	0	35	0	0	0	0	0	0	0	0	0	0	0	0	0	0	0	0	0	0	0	0	0	0	0	0	0	0	0	0	0	0
CHK1	0	0	0	0	0	0	0	0	0	0	0	100	0	0	0	0	0	0	0	0	0	0	0	0	0	0	0	0	0	0	0	0	0	0	0	0	0	0	0	0	0	0	0	0	0	0	0	0	0
DAPK1	0	0	0	0	0	0	0	38	0	0	0	0	100	0	0	0	0	0	0	0	0	0	0	0	0	0	0	0	0	0	0	0	0	0	0	0	0	0	0	0	0	0	0	0	0	0	0	0	0
EGFR	39	40	0	0	0	0	0	0	0	0	0	0	0	100	35	38	49	0	0	0	0	0	0	0	37	35	0	0	0	41	37	0	0	0	0	38	40	0	0	0	0	0	0	0	0	0	0	0	35
EphA2	41	38	0	0	0	0	0	0	0	0	0	0	0	37	100	51	0	0	0	35	0	0	0	0	0	41	0	0	0	35	44	0	0	0	0	38	39	0	0	0	0	0	0	0	0	0	0	0	37
EphA3	40	37	0	0	0	0	0	0	0	0	0	0	0	36	51	100	0	0	0	35	35	0	0	0	0	37	0	0	0	36	42	0	0	0	0	0	37	0	0	0	0	0	0	0	0	0	0	0	0
ErbB3	0	39	0	0	0	0	0	0	0	0	0	0	0	48	0	0	100	0	0	0	0	0	0	0	0	0	0	0	0	39	35	0	0	0	0	0	36	0	0	0	0	0	0	0	0	0	0	0	0
Erk2	0	0	0	0	0	0	0	0	37	39	0	0	0	0	0	0	0	100	51	0	0	0	0	0	0	0	0	43	43	38	0	0	38	0	0	0	0	0	0	0	42	0	0	0	0	35	0	0	0
Erk5	0	0	0	0	0	0	0	0	39	35	35	0	0	0	0	0	0	51	100	0	0	0	0	0	0	0	0	41	39	0	0	0	0	0	0	0	0	0	0	0	39	0	0	0	0	0	0	0	0
FGFR2	40	36	0	0	37	0	0	0	0	0	0	0	0	0	35	35	0	0	0	100	69	0	0	40	40	0	35	0	0	40	37	0	0	0	0	38	37	0	0	0	0	0	0	0	0	0	0	0	49
FGFR3	38	37	0	0	38	0	0	0	0	0	0	0	0	0	0	35	0	0	0	69	100	0	0	40	41	0	0	0	0	40	39	0	0	0	0	38	0	0	0	0	0	0	0	0	0	0	0	0	52
GSK3B	0	0	0	0	0	0	0	0	0	38	0	0	0	0	0	0	0	0	35	0	0	100	0	0	0	0	0	0	0	0	0	0	0	0	0	0	0	0	0	0	0	0	0	0	0	0	0	0	0
HGK	0	0	0	0	0	0	0	0	0	30	0	0	0	0	0	0	0	0	0	0	0	0	100	0	0	0	0	0	0	0	0	0	0	0	0	0	0	0	43	44	0	38	37	0	0	0	0	0	0
IGF1R	38	0	0	0	40	0	0	0	0	0	0	0	0	0	0	0	0	0	0	40	38	0	0	100	57	35	0	0	0	0	38	0	0	0	0	0	40	0	0	0	0	0	0	0	0	0	0	0	40
INSR	40	36	0	0	42	0	0	0	0	0	0	0	0	0	0	0	0	0	0	40	41	0	0	58	100	0	0	0	0	40	37	0	0	0	0	0	42	0	0	0	0	0	0	0	0	0	0	0	37
ITK	38	37	0	0	39	0	0	0	0	0	0	0	0	35	41	37	0	0	0	0	0	0	0	35	0	100	0	0	0	39	36	0	0	0	0	38	37	0	0	0	0	0	0	0	0	0	0	0	0
JAK2-b	35	41	0	0	0	0	0	0	0	0	0	0	0	0	0	0	0	0	0	35	0	0	0	0	0	0	100	0	0	0	35	0	0	0	0	0	0	0	0	0	0	0	0	0	0	0	0	0	0
JNK1	0	0	0	0	0	0	0	0	36	0	0	0	0	0	0	0	0	43	41	0	0	0	0	0	0	0	0	100	91	35	0	0	0	0	0	0	0	0	0	0	44	0	0	0	0	0	0	0	0
JNK3	0	0	0	0	0	0	0	0	36	0	0	0	0	0	0	0	0	43	40	0	0	0	0	0	0	0	0	91	100	35	0	0	0	0	0	0	0	0	0	0	45	0	0	0	0	0	0	0	0
KIT	0	42	0	0	0	0	0	0	0	0	35	0	0	40	40	42	38	38	0	40	38	0	0	0	42	39	0	37	37	100	44	0	0	0	0	41	46	0	0	0	35	0	35	0	0	0	0	0	39
LCK	45	40	0	0	40	0	0	0	0	0	0	0	0	37	44	42	35	0	0	37	39	0	0	38	37	36	35	0	28	43	100	0	0	0	0	38	36	0	0	0	0	0	0	0	0	0	0	0	39
LIMK1	0	0	0	0	0	0	0	0	0	0	0	0	0	0	0	0	0	0	0	0	0	0	0	0	0	0	0	0	0	0	31	100	0	0	0	0	0	0	0	0	0	0	0	0	0	0	0	0	0
MAP2K1	0	0	0	0	0	0	0	0	0	0	0	0	0	0	0	0	0	38	0	0	0	0	0	0	0	0	0	0	0	0	0	0	100	0	0	0	0	0	36	0	0	0	0	0	40	0	0	0	0
MAPKAPK2	0	0	0	0	0	0	0	38	0	0	0	0	0	0	0	0	0	0	0	0	0	0	0	0	0	0	0	0	0	0	0	0	0	100	0	0	0	0	0	0	0	0	0	0	0	0	0	0	0
MELK	0	0	35	0	0	0	0	35	0	0	0	35	0	0	0	0	0	0	0	0	0	0	0	0	0	0	0	0	0	0	0	0	0	0	100	0	0	0	0	0	0	0	0	0	0	35	0	0	0
MER	44	38	0	0	38	0	0	0	0	0	0	0	0	38	38	0	0	0	0	38	38	0	0	0	0	38	0	0	0	41	38	0	0	0	36	100	41	0	0	0	0	0	0	0	0	0	0	0	39
MET	41	37	0	0	38	0	0	0	0	0	0	0	0	38	39	37	36	0	0	37	36	0	0	39	42	37	0	0	0	46	36	0	0	0	0	41	100	0	0	0	0	0	0	0	0	0	0	0	0
MRCKb	0	0	39	38	0	35	0	35	0	0	0	0	0	0	0	0	0	0	0	23	0	0	0	0	0	0	0	0	0	0	0	0	0	0	0	0	0	100	0	0	0	0	0	0	0	37	0	0	0
MST2	0	0	0	0	0	0	0	0	0	0	0	0	0	0	0	0	0	0	0	0	0	0	46	0	0	0	0	0	0	0	0	0	36	0	0	0	0	0	100	54	0	43	38	0	0	0	0	0	0
MST3	0	0	0	0	0	0	0	0	0	0	0	0	0	0	0	0	0	0	0	0	0	0	44	0	0	0	0	0	0	0	0	0	0	0	0	0	0	0	55	100	0	46	38	0	0	0	0	0	0
p38g	0	0	0	0	0	0	0	0	37	36	0	0	0	0	0	0	0	42	40	0	0	0	0	0	0	0	0	44	45	35	0	0	0	0	0	0	0	0	0	0	100	0	0	0	0	0	0	0	0
PAK1	0	0	0	0	0	0	0	0	0	0	0	0	0	0	0	0	0	0	0	0	0	0	39	0	0	0	0	0	0	0	0	0	0	0	0	0	0	0	43	46	0	100	53	0	0	0	0	0	0
PAK4	0	0	0	0	30	0	0	0	0	0	0	0	0	0	0	0	0	0	0	0	0	0	38	0	0	0	0	0	0	0	0	0	0	0	0	0	0	0	38	38	0	53	100	0	0	0	0	0	0
PDK1	0	0	37	35	0	37	0	0	0	0	0	0	0	0	0	0	0	0	0	0	0	0	0	0	0	0	0	0	0	0	0	0	0	0	0	0	0	0	0	0	0	0	0	100	0	38	0	0	0
PIM1	0	0	0	0	0	0	0	0	0	0	0	0	0	0	0	0	0	0	0	0	0	0	0	0	0	0	0	0	0	0	0	0	40	0	0	0	0	0	0	0	0	0	0	0	100	0	0	0	0
PKACa	0	0	45	43	0	0	0	0	0	0	0	0	0	0	0	0	0	35	0	0	0	0	0	0	0	0	0	0	0	0	0	0	0	0	35	0	0	37	0	0	0	0	0	38	0	100	0	0	0
PKR	0	0	0	0	0	0	0	0	0	0	0	0	0	0	0	0	0	0	0	0	0	0	0	0	0	0	0	0	0	0	0	0	0	0	0	0	0	0	0	0	0	0	0	0	0	0	100	0	0
PLK1	0	0	32	32	0	0	0	0	0	0	0	0	0	0	0	0	0	0	0	0	0	0	0	0	0	0	0	0	0	0	0	0	0	0	35	0	36	0	0	0	0	0	0	0	0	0	0	100	0
RET	38	0	0	0	0	0	0	0	0	0	0	0	0	0	37	0	0	0	0	46	50	0	0	39	38	0	0	0	0	0	39	0	0	0	0	39	0	0	0	0	0	0	0	0	0	0	0	0	100
RIPK2	0	0	0	0	0	0	0	0	0	0	0	0	0	0	0	0	0	0	0	0	0	0	0	0	0	0	0	0	0	0	0	0	0	0	0	0	0	0	0	0	0	0	0	0	0	0	0	0	0
RSK1	0	0	43	40	0	36	0	0	0	0	0	0	0	0	0	0	0	0	0	0	0	0	0	0	0	0	0	0	0	0	0	0	0	38	0	0	0	35	0	0	0	0	0	0	0	39	0	0	0
SRC	44	38	0	0	38	0	0	0	0	0	0	0	0	36	41	45	37	0	0	36	35	0	0	40	38	38	0	0	0	41	60	0	0	0	0	38	38	0	0	0	0	0	0	0	0	0	0	0	37
SYK	40	39	0	0	0	0	0	0	0	0	0	0	0	42	36	36	38	0	0	37	37	0	0	0	0	38	0	0	0	43	37	0	0	0	0	36	0	0	0	0	0	0	0	0	0	0	0	0	37
TYK2	0	39	0	0	0	0	0	0	0	0	0	0	0	35	0	0	35	0	0	0	35	0	0	0	0	0	38	0	0	36	0	0	0	0	35	0	0	0	0	0	0	0	0	0	0	0	0	0	0
ZAP70	34	39	0	0	36	0	0	0	0	0	0	0	0	40	39	39	36	0	0	0	0	0	0	0	0	38	0	0	0	41	0	0	0	0	0	35	0	0	0	0	0	0	0	0	0	0	0	0	0
[truncated: 6 more columns]
