# Supplementary material for: Computational analysis of kinase inhibitor selectivity using structural knowledge
Source: Oxford University Press journal article supplement (doi:10.1093/bioinformatics/bty582), 2018-07-06
Supplement: bioinformatics_35_2_235_s7.xlsx [file bioinformatics_35_2_235_s7.xlsx]

## Sheet: Sheet1
Target	Compound										Compound	Target	SI	PFS	Activity
ABL1	Dasatinib	Imatinib	Nilotinib	PD-173955	SKI-606						ABL1	ABL1	100	-9.6	1
AKT1	A-674563	GSK-690693									ABL1	ACK	41	-4.515	0
ALK	Crizotinib	GSK-1838705A	TAE-684								ABL1	AKT1	29	-3.309	0
AurA	KW-2449	MLN-8054	VX-680/MK-0457								ABL1	AKT2	27	-3.774	0
CDK2	AT-7519	BMS-387032/SNS-032	Flavopiridol	R547							ABL1	ALK	39	-4.348	0
EGFR	BIBW-2992	CI-1033	Erlotinib	Gefitinib	HKI-272	Lapatinib	Vandetanib				ABL1	AurA	26	-3.574	0
FGFR2	CHIR-258/TKI-258										ABL1	BMPR2	24	-4.789	0
FGFR3	CHIR-258/TKI-258										ABL1	CaMK1a	26	-4.374	0
IGF1R	GSK-1838705A										ABL1	CDK2	29	-4.15	0
JAK2-b	CEP-701	INCB018424	TG-101348								ABL1	CDK7	27	-4.221	0
KIT	AB-1010	AC220	AG-013736	AST-487	Imatinib	MLN-518	Nilotinib	PKC-412	Sunitinib		ABL1	CDK9	25	-5.022	0
MAP2K1	AZD-6244/ARRY-886	CI-1040									ABL1	CHK1	28	-4.162	0
MAPKAPK2	AZD-6244/ARRY-886	CI-1040									ABL1	DAPK1	26	-3.405	0
MET	Crizotinib	EXEL-2880/GSK-1363089	PHA-665752								ABL1	EGFR	39	-4.93	0
PLK1	BI-2536	GSK-461364A									ABL1	EphA2	41	-5.478	0
RET	Vandetanib										ABL1	EphA3	40	-5.183	0
SRC	Dasatinib	PD-173955	SKI-606								ABL1	ErbB3	34	-4.84	0
											ABL1	Erk2	25	-4.297	0
											ABL1	Erk5	25	-4.3	0
											ABL1	FGFR2	40	-5.846	1
											ABL1	FGFR3	38	-5.245	1
											ABL1	GSK3B	25	-4.225	0
											ABL1	HGK	26	-4.171	1
											ABL1	IGF1R	38	-3.502	0
											ABL1	INSR	40	-3.858	0
											ABL1	ITK	38	-4.807	1
											ABL1	JAK2-b	35	-4.119	0
											ABL1	JNK1	24	-3.983	0
											ABL1	JNK3	24	-3.181	0
											ABL1	KIT	31	-4.268	0
											ABL1	LCK	45	-5.939	1
											ABL1	LIMK1	30	-4.283	0
											ABL1	MAP2K1	26	-4.259	0
											ABL1	MAPKAPK2	22	-3.576	0
											ABL1	MELK	24	-4.021	0
											ABL1	MER	44	-3.795	0
											ABL1	MET	41	-4.029	0
											ABL1	MRCKb	23	-4.665	0
											ABL1	MST2	25	-3.883	0
											ABL1	MST3	28	-5.307	1
											ABL1	p38g	27	-4.455	0
											ABL1	PAK1	25	-4.251	0
											ABL1	PAK4	25	-4.754	0
											ABL1	PDK1	25	-3.925	0
											ABL1	PIM1	26	-3.899	0
											ABL1	PKACa	27	-3.861	0
											ABL1	PKR	20	-3.617	0
											ABL1	PLK1	23	-3.836	0
											ABL1	RET	38	-4.352	0
											ABL1	RIPK2	26	-4.874	0
											ABL1	RSK1	28	-4.578	0
											ABL1	SRC	44	-6.878	0
											ABL1	SYK	43	-5.15	0
											ABL1	TYK2	32	-4.716	0
											ABL1	ZAP70	34	-4.581	0
											AKT1	ABL1	29	-3.309	0
											AKT1	ACK	27	-3.396	0
											AKT1	AKT1	100	-16.2	1
											AKT1	AKT2	82	-12.322	0
											AKT1	ALK	21	-1.879	0
											AKT1	AurA	37	-3.483	0
											AKT1	BMPR2	25	-5.243	0
											AKT1	CaMK1a	36	-4.217	0
											AKT1	CDK2	27	-3.901	0
											AKT1	CDK7	30	-3.316	0
											AKT1	CDK9	25	-4.352	0
											AKT1	CHK1	27	-3.414	0
											AKT1	DAPK1	31	-3.871	0
											AKT1	EGFR	24	-3.579	0
											AKT1	EphA2	23	-3.106	0
											AKT1	EphA3	25	-3.159	0
											AKT1	ErbB3	23	-2.894	0
											AKT1	Erk2	27	-3.632	0
											AKT1	Erk5	26	-3.453	0
											AKT1	FGFR2	25	-4.772	0
											AKT1	FGFR3	25	-4.756	0
											AKT1	GSK3B	26	-5.919	0
											AKT1	HGK	27	-3.854	1
											AKT1	IGF1R	25	-3.134	0
											AKT1	INSR	24	-3.678	0
											AKT1	ITK	25	-4.114	0
											AKT1	JAK2-b	28	-3.205	0
											AKT1	JNK1	24	-3.476	0
											AKT1	JNK3	23	-3.208	0
											AKT1	KIT	25	-3.982	0
											AKT1	LCK	25	-2.959	0
											AKT1	LIMK1	28	-3.369	0
											AKT1	MAP2K1	28	-3.285	0
											AKT1	MAPKAPK2	33	-3.997	0
											AKT1	MELK	35	-4.872	0
											AKT1	MER	26	-2.903	0
											AKT1	MET	27	-4.028	0
											AKT1	MRCKb	39	-5.962	1
											AKT1	MST2	27	-4.764	0
											AKT1	MST3	32	-5.482	0
											AKT1	p38g	28	-4.824	0
											AKT1	PAK1	33	-3.947	0
											AKT1	PAK4	29	-5.269	1
											AKT1	PDK1	35	-4.381	0
											AKT1	PIM1	26	-2.944	0
											AKT1	PKACa	45	-8.45	1
											AKT1	PKR	28	-4.674	0
											AKT1	PLK1	31	-4.34	0
											AKT1	RET	25	-4.886	0
											AKT1	RIPK2	26	-4.809	0
											AKT1	RSK1	43	-4.689	0
											AKT1	SRC	25	-4.299	0
											AKT1	SYK	30	-4.1	0
											AKT1	TYK2	29	-5.428	0
											AKT1	ZAP70	28	-3.037	0
											ALK	ABL1	38	-4.348	0
											ALK	ACK	36	-3.856	1
											ALK	AKT1	21	-1.879	0
											ALK	AKT2	20	-2.044	0
											ALK	ALK	100	-8.4	1
											ALK	AurA	27	-3.375	0
											ALK	BMPR2	24	-2.073	0
											ALK	CaMK1a	22	-3.486	0
											ALK	CDK2	23	-2.657	0
											ALK	CDK7	22	-3.385	0
											ALK	CDK9	24	-2.789	0
											ALK	CHK1	25	-3.029	0
											ALK	DAPK1	27	-3.016	0
											ALK	EGFR	30	-3.599	0
											ALK	EphA2	34	-3.621	0
											ALK	EphA3	34	-3.396	1
											ALK	ErbB3	29	-3.072	0
											ALK	Erk2	25	-3.522	0
											ALK	Erk5	24	-5.101	1
											ALK	FGFR2	37	-4.487	0
											ALK	FGFR3	38	-3.982	1
											ALK	GSK3B	27	-2.907	0
											ALK	HGK	24	-3.472	0
											ALK	IGF1R	39	-3.637	0
											ALK	INSR	38	-4.678	1
											ALK	ITK	39	-3.902	0
											ALK	JAK2-b	29	-1.938	0
											ALK	JNK1	23	-3.257	0
											ALK	JNK3	22	-2.863	0
											ALK	KIT	29	-3.801	0
											ALK	LCK	40	-3.674	0
											ALK	LIMK1	27	-2.374	0
											ALK	MAP2K1	24	-3.498	0
											ALK	MAPKAPK2	27	-2.82	0
											ALK	MELK	23	-3.39	0
											ALK	MER	38	-3.238	1
											ALK	MET	38	-3.32	0
											ALK	MRCKb	23	-2.992	0
											ALK	MST2	25	-3.533	0
											ALK	MST3	26	-3.306	0
											ALK	p38g	26	-2.994	0
											ALK	PAK1	25	-3.868	0
											ALK	PAK4	30	-3.105	0
											ALK	PDK1	21	-3.284	0
											ALK	PIM1	23	-3.694	0
											ALK	PKACa	24	-2.527	0
											ALK	PKR	22	-2.943	0
											ALK	PLK1	25	-2.627	0
											ALK	RET	33	-2.926	1
											ALK	RIPK2	27	-3.097	0
											ALK	RSK1	23	-3.354	0
											ALK	SRC	38	-3.929	0
											ALK	SYK	35	-4.236	0
											ALK	TYK2	30	-3.502	0
											ALK	ZAP70	36	-3.801	0
											AurA	ABL1	26	-3.574	0
											AurA	ACK	27	-3.607	1
											AurA	AKT1	37	-3.483	0
											AurA	AKT2	36	-3.426	0
											AurA	ALK	27	-3.375	0
											AurA	AurA	100	-8.4	1
											AurA	BMPR2	24	-3.728	0
											AurA	CaMK1a	32	-4.381	0
											AurA	CDK2	29	-3.437	0
											AurA	CDK7	27	-2.842	0
											AurA	CDK9	30	-3.174	0
											AurA	CHK1	29	-3.337	0
											AurA	DAPK1	31	-3.626	0
											AurA	EGFR	24	-4.225	0
											AurA	EphA2	28	-4.204	0
											AurA	EphA3	27	-3.762	0
											AurA	ErbB3	24	-4.354	0
											AurA	Erk2	25	-2.45	0
											AurA	Erk5	26	-3.567	0
											AurA	FGFR2	26	-5.412	0
											AurA	FGFR3	28	-6.004	0
											AurA	GSK3B	29	-5.396	0
											AurA	HGK	28	-3.644	1
											AurA	IGF1R	21	-2.941	0
											AurA	INSR	22	-3.496	0
											AurA	ITK	26	-3.451	0
											AurA	JAK2-b	26	-3.99	0
											AurA	JNK1	25	-3.121	0
											AurA	JNK3	25	-3.303	0
											AurA	KIT	21	-3.785	0
											AurA	LCK	25	-3.72	0
											AurA	LIMK1	28	-4.482	0
											AurA	MAP2K1	28	-3.484	0
											AurA	MAPKAPK2	31	-3.429	0
											AurA	MELK	30	-4.548	0
											AurA	MER	24	-2.571	0
											AurA	MET	25	-3.259	0
											AurA	MRCKb	35	-3.475	0
											AurA	MST2	30	-3.403	0
											AurA	MST3	32	-3.921	0
											AurA	p38g	32	-2.462	0
											AurA	PAK1	26	-4.474	0
											AurA	PAK4	28	-3.48	0
											AurA	PDK1	32	-4.69	1
											AurA	PIM1	29	-3.747	0
											AurA	PKACa	32	-3.536	0
											AurA	PKR	25	-2.733	0
											AurA	PLK1	32	-3.564	0
											AurA	RET	23	-5.39	1
											AurA	RIPK2	28	-3.675	0
											AurA	RSK1	36	-4.98	0
											AurA	SRC	23	-4.853	0
											AurA	SYK	25	-3.358	0
											AurA	TYK2	27	-5.304	1
											AurA	ZAP70	27	-4.064	0
											CDK2	ABL1	29	-4.15	0
											CDK2	ACK	30	-3.979	0
											CDK2	AKT1	27	-3.901	0
											CDK2	AKT2	27	-4.343	0
											CDK2	ALK	23	-2.657	0
											CDK2	AurA	29	-3.437	0
											CDK2	BMPR2	26	-4.3	0
											CDK2	CaMK1a	28	-4.679	0
											CDK2	CDK2	100	-13.8	1
											CDK2	CDK7	45	-5.239	0
											CDK2	CDK9	40	-5.635	0
											CDK2	CHK1	33	-4.262	0
											CDK2	DAPK1	28	-4.721	0
											CDK2	EGFR	26	-4.075	0
											CDK2	EphA2	30	-4.291	0
											CDK2	EphA3	27	-3.214	0
											CDK2	ErbB3	26	-3.359	0
											CDK2	Erk2	37	-5.195	0
											CDK2	Erk5	39	-4.749	0
											CDK2	FGFR2	26	-4.702	0
											CDK2	FGFR3	26	-4.659	0
											CDK2	GSK3B	33	-6.509	1
											CDK2	HGK	32	-5.284	0
											CDK2	IGF1R	23	-3.414	0
											CDK2	INSR	24	-4.152	0
											CDK2	ITK	30	-4.273	0
											CDK2	JAK2-b	33	-4.808	0
											CDK2	JNK1	36	-4.229	0
											CDK2	JNK3	36	-3.072	0
											CDK2	KIT	26	-4.476	0
											CDK2	LCK	26	-4.083	0
											CDK2	LIMK1	29	-2.634	0
											CDK2	MAP2K1	33	-3.976	0
											CDK2	MAPKAPK2	25	-4.476	0
											CDK2	MELK	31	-5.196	1
											CDK2	MER	26	-3.832	0
											CDK2	MET	29	-4.237	0
											CDK2	MRCKb	28	-5.279	1
											CDK2	MST2	30	-4.366	0
											CDK2	MST3	35	-6.165	0
											CDK2	p38g	37	-5.587	0
											CDK2	PAK1	31	-4.095	0
											CDK2	PAK4	28	-5.066	0
											CDK2	PDK1	28	-5.07	0
											CDK2	PIM1	29	-4.08	0
											CDK2	PKACa	32	-4.759	0
											CDK2	PKR	26	-3.815	0
											CDK2	PLK1	28	-5.355	0
											CDK2	RET	25	-5.092	0
											CDK2	RIPK2	25	-4.981	0
											CDK2	RSK1	33	-5.249	1
											CDK2	SRC	29	-5.09	0
											CDK2	SYK	24	-4.232	0
											CDK2	TYK2	32	-4.643	0
											CDK2	ZAP70	29	-3.425	0
											EGFR	ABL1	39	-4.93	0
											EGFR	ACK	40	-5.359	1
											EGFR	AKT1	24	-3.759	0
											EGFR	AKT2	24	-3.61	0
											EGFR	ALK	33	-3.599	0
											EGFR	AurA	24	-4.225	0
											EGFR	BMPR2	24	-3.393	0
											EGFR	CaMK1a	27	-4.836	0
											EGFR	CDK2	26	-4.075	0
											EGFR	CDK7	25	-4.463	0
											EGFR	CDK9	23	-4.28	0
											EGFR	CHK1	25	-2.862	1
											EGFR	DAPK1	28	-3.516	0
											EGFR	EGFR	100	-13.2	1
											EGFR	EphA2	35	-4.692	0
											EGFR	EphA3	38	-4.733	0
											EGFR	ErbB3	49	-5.984	1
											EGFR	Erk2	22	-4.681	0
											EGFR	Erk5	24	-3.903	0
											EGFR	FGFR2	34	-5.321	0
											EGFR	FGFR3	33	-5.387	0
											EGFR	GSK3B	26	-5.63	0
											EGFR	HGK	25	-4.558	1
											EGFR	IGF1R	34	-4.037	0
											EGFR	INSR	37	-5.09	0
											EGFR	ITK	35	-5.81	0
											EGFR	JAK2-b	33	-5.162	0
											EGFR	JNK1	27	-4.792	0
											EGFR	JNK3	28	-3.976	0
											EGFR	KIT	41	-4.849	0
											EGFR	LCK	37	-3.978	0
											EGFR	LIMK1	27	-3.543	0
											EGFR	MAP2K1	27	-5.137	1
											EGFR	MAPKAPK2	25	-4.063	0
											EGFR	MELK	25	-4.097	0
											EGFR	MER	38	-4.754	0
											EGFR	MET	40	-6.218	1
											EGFR	MRCKb	22	-3.201	0
											EGFR	MST2	29	-4.23	0
											EGFR	MST3	31	-4.078	0
											EGFR	p38g	30	-3.142	0
											EGFR	PAK1	28	-4.763	0
											EGFR	PAK4	24	-4.067	0
											EGFR	PDK1	25	-4.225	0
											EGFR	PIM1	24	-3.252	0
											EGFR	PKACa	24	-4.52	0
											EGFR	PKR	25	-3.404	0
											EGFR	PLK1	29	-3.413	0
											EGFR	RET	35	-4.901	0
											EGFR	RIPK2	26	-4.512	0
											EGFR	RSK1	29	-4.803	0
											EGFR	SRC	36	-6.474	1
											EGFR	SYK	43	-4.038	0
											EGFR	TYK2	35	-5.027	1
											EGFR	ZAP70	40	-5.488	0
											FGFR2	ABL1	40	-5.846	0
											FGFR2	ACK	36	-5.106	0
											FGFR2	AKT1	25	-4.772	0
											FGFR2	AKT2	26	-4.797	0
											FGFR2	ALK	37	-4.487	0
											FGFR2	AurA	26	-5.412	0
											FGFR2	BMPR2	26	-4.498	0
											FGFR2	CaMK1a	27	-3.584	0
											FGFR2	CDK2	26	-4.702	0
											FGFR2	CDK7	27	-4.329	0
											FGFR2	CDK9	26	-4.815	0
											FGFR2	CHK1	31	-4.451	0
											FGFR2	DAPK1	25	-4.813	0
											FGFR2	EGFR	34	-5.321	0
											FGFR2	EphA2	35	-4.628	0
											FGFR2	EphA3	35	-4.821	0
											FGFR2	ErbB3	33	-5.315	0
											FGFR2	Erk2	34	-4.617	0
											FGFR2	Erk5	27	-4.808	0
											FGFR2	FGFR2	100	-13.2	1
											FGFR2	FGFR3	69	-10.671	0
											FGFR2	GSK3B	32	-6.277	0
											FGFR2	HGK	25	-5.311	0
											FGFR2	IGF1R	40	-3.529	0
											FGFR2	INSR	40	-5.285	0
											FGFR2	ITK	34	-4.949	0
											FGFR2	JAK2-b	35	-3.991	0
											FGFR2	JNK1	28	-4.557	0
											FGFR2	JNK3	29	-4.07	0
											FGFR2	KIT	40	-5.239	0
											FGFR2	LCK	37	-4.758	0
											FGFR2	LIMK1	28	-4.708	0
											FGFR2	MAP2K1	28	-5.029	0
											FGFR2	MAPKAPK2	25	-4.781	0
											FGFR2	MELK	26	-5.547	0
											FGFR2	MER	38	-3.323	0
											FGFR2	MET	37	-4.158	0
											FGFR2	MRCKb	23	-5.222	0
											FGFR2	MST2	26	-4.95	1
											FGFR2	MST3	28	-6.037	0
											FGFR2	p38g	28	-4.433	0
											FGFR2	PAK1	24	-5.326	0
											FGFR2	PAK4	23	-5.475	0
											FGFR2	PDK1	24	-4.809	0
											FGFR2	PIM1	21	-5.158	0
											FGFR2	PKACa	23	-5.099	0
											FGFR2	PKR	23	-5.455	0
											FGFR2	PLK1	25	-3.863	0
											FGFR2	RET	49	-7.8	0
											FGFR2	RIPK2	24	-6.351	0
											FGFR2	RSK1	30	-5.015	0
											FGFR2	SRC	36	-6.239	0
											FGFR2	SYK	38	-5.372	0
											FGFR2	TYK2	33	-7.424	0
											FGFR2	ZAP70	33	-5.064	0
											FGFR3	ABL1	38	-5.245	0
											FGFR3	ACK	37	-5.359	0
											FGFR3	AKT1	25	-4.756	0
											FGFR3	AKT2	27	-5.427	0
											FGFR3	ALK	38	-3.982	0
											FGFR3	AurA	28	-6.004	0
											FGFR3	BMPR2	32	-4.935	0
											FGFR3	CaMK1a	25	-3.971	0
											FGFR3	CDK2	26	-4.659	0
											FGFR3	CDK7	26	-4.301	0
											FGFR3	CDK9	26	-4.462	0
											FGFR3	CHK1	29	-4.281	0
											FGFR3	DAPK1	27	-4.987	0
											FGFR3	EGFR	33	-5.387	0
											FGFR3	EphA2	34	-4.883	0
											FGFR3	EphA3	35	-4.914	0
											FGFR3	ErbB3	34	-5.695	0
											FGFR3	Erk2	27	-4.899	0
											FGFR3	Erk5	25	-5.28	0
											FGFR3	FGFR2	69	-10.671	0
											FGFR3	FGFR3	100	-13.2	1
											FGFR3	GSK3B	34	-6.503	0
											FGFR3	HGK	23	-4.241	1
											FGFR3	IGF1R	40	-3.102	0
											FGFR3	INSR	41	-4.93	0
											FGFR3	ITK	34	-4.653	0
											FGFR3	JAK2-b	33	-4.856	0
											FGFR3	JNK1	28	-5.045	0
											FGFR3	JNK3	28	-4.657	0
											FGFR3	KIT	40	-6.495	0
											FGFR3	LCK	39	-4.995	0
											FGFR3	LIMK1	29	-3.72	0
											FGFR3	MAP2K1	31	-3.924	0
											FGFR3	MAPKAPK2	24	-4.035	0
											FGFR3	MELK	27	-5.427	0
											FGFR3	MER	38	-3.46	0
											FGFR3	MET	34	-4.792	0
											FGFR3	MRCKb	23	-4.588	0
											FGFR3	MST2	26	-5.69	0
											FGFR3	MST3	28	-5.946	0
											FGFR3	p38g	28	-4.487	0
											FGFR3	PAK1	24	-4.922	0
											FGFR3	PAK4	24	-6.509	0
											FGFR3	PDK1	25	-5.261	0
											FGFR3	PIM1	25	-4.134	0
											FGFR3	PKACa	23	-5.1	0
											FGFR3	PKR	24	-4.676	0
											FGFR3	PLK1	24	-3.842	0
											FGFR3	RET	52	-7.803	0
											FGFR3	RIPK2	25	-6.682	0
											FGFR3	RSK1	27	-4.763	0
											FGFR3	SRC	35	-7.281	0
											FGFR3	SYK	37	-4.869	0
											FGFR3	TYK2	35	-7.633	0
											FGFR3	ZAP70	34	-4.19	0
											IGF1R	ABL1	38	-3.502	0
											IGF1R	ACK	34	-3.472	0
											IGF1R	AKT1	25	-3.134	0
											IGF1R	AKT2	24	-3.232	0
											IGF1R	ALK	40	-3.637	1
											IGF1R	AurA	21	-2.941	0
											IGF1R	BMPR2	26	-2.832	0
											IGF1R	CaMK1a	24	-4.165	0
											IGF1R	CDK2	23	-3.414	0
											IGF1R	CDK7	22	-3.071	0
											IGF1R	CDK9	25	-4.283	0
											IGF1R	CHK1	26	-2.922	0
											IGF1R	DAPK1	22	-3.311	0
											IGF1R	EGFR	33	-4.037	0
											IGF1R	EphA2	33	-3.01	0
											IGF1R	EphA3	32	-2.841	0
											IGF1R	ErbB3	30	-3.286	0
											IGF1R	Erk2	24	-3.157	0
											IGF1R	Erk5	24	-3.285	0
											IGF1R	FGFR2	40	-3.529	0
											IGF1R	FGFR3	38	-3.102	0
											IGF1R	GSK3B	26	-3.158	0
											IGF1R	HGK	25	-3.169	0
											IGF1R	IGF1R	100	-9	1
											IGF1R	INSR	57	-6.109	0
											IGF1R	ITK	35	-4.796	0
											IGF1R	JAK2-b	31	-3.68	0
											IGF1R	JNK1	23	-3.617	0
											IGF1R	JNK3	23	-3.099	0
											IGF1R	KIT	25	-3.379	0
											IGF1R	LCK	38	-3.501	0
											IGF1R	LIMK1	28	-2.679	0
											IGF1R	MAP2K1	27	-4.592	0
											IGF1R	MAPKAPK2	23	-3.957	0
											IGF1R	MELK	22	-2.864	0
											IGF1R	MER	33	-3.426	1
											IGF1R	MET	40	-3.393	0
											IGF1R	MRCKb	23	-1.777	0
											IGF1R	MST2	24	-3.626	0
											IGF1R	MST3	27	-3.864	0
											IGF1R	p38g	29	-2.641	0
											IGF1R	PAK1	25	-2.963	0
											IGF1R	PAK4	23	-3.667	0
											IGF1R	PDK1	21	-3.367	0
											IGF1R	PIM1	26	-3.132	0
											IGF1R	PKACa	24	-2.89	0
											IGF1R	PKR	26	-3.409	0
											IGF1R	PLK1	25	-3.402	0
											IGF1R	RET	40	-3.345	0
											IGF1R	RIPK2	25	-3.644	0
											IGF1R	RSK1	25	-4.519	0
											IGF1R	SRC	40	-4.387	0
											IGF1R	SYK	34	-4.367	0
											IGF1R	TYK2	33	-3.401	0
											IGF1R	ZAP70	34	-3.936	0
											JAK2-b	ABL1	35	-4.119	0
											JAK2-b	ACK	41	-3.386	0
											JAK2-b	AKT1	28	-3.205	0
											JAK2-b	AKT2	28	-3.222	0
											JAK2-b	ALK	29	-1.938	0
											JAK2-b	AurA	26	-3.99	0
											JAK2-b	BMPR2	29	-3.441	0
											JAK2-b	CaMK1a	31	-3.938	0
											JAK2-b	CDK2	33	-4.808	0
											JAK2-b	CDK7	28	-4.595	0
											JAK2-b	CDK9	26	-4.501	0
											JAK2-b	CHK1	31	-3.15	1
											JAK2-b	DAPK1	30	-2.981	0
											JAK2-b	EGFR	33	-5.162	1
											JAK2-b	EphA2	33	-3.352	0
											JAK2-b	EphA3	33	-3.468	1
											JAK2-b	ErbB3	32	-3.939	0
											JAK2-b	Erk2	30	-3.451	0
											JAK2-b	Erk5	27	-2.684	0
											JAK2-b	FGFR2	35	-3.991	0
											JAK2-b	FGFR3	33	-4.856	1
											JAK2-b	GSK3B	30	-3.907	0
											JAK2-b	HGK	27	-4.316	1
											JAK2-b	IGF1R	31	-3.68	0
											JAK2-b	INSR	30	-2.948	0
											JAK2-b	ITK	29	-4.224	0
											JAK2-b	JAK2-b	100	-14.4	1
											JAK2-b	JNK1	24	-3.217	0
											JAK2-b	JNK3	25	-2.686	0
											JAK2-b	KIT	30	-3.416	0
											JAK2-b	LCK	35	-4.056	0
											JAK2-b	LIMK1	29	-3.682	0
											JAK2-b	MAP2K1	31	-4.342	0
											JAK2-b	MAPKAPK2	29	-3.278	0
											JAK2-b	MELK	29	-3.77	0
											JAK2-b	MER	30	-3.01	0
											JAK2-b	MET	34	-2.791	0
											JAK2-b	MRCKb	22	-2.472	0
											JAK2-b	MST2	30	-4.405	0
											JAK2-b	MST3	32	-3.91	0
											JAK2-b	p38g	29	-3.369	0
											JAK2-b	PAK1	28	-3.695	0
											JAK2-b	PAK4	25	-4.086	0
											JAK2-b	PDK1	31	-3.57	0
											JAK2-b	PIM1	25	-2.884	0
											JAK2-b	PKACa	27	-3.211	0
											JAK2-b	PKR	28	-3.8	0
											JAK2-b	PLK1	32	-3.445	0
											JAK2-b	RET	33	-4.234	0
											JAK2-b	RIPK2	30	-4.022	0
											JAK2-b	RSK1	26	-5.091	0
											JAK2-b	SRC	30	-5.075	0
											JAK2-b	SYK	35	-4.004	0
											JAK2-b	TYK2	38	-5.12	1
											JAK2-b	ZAP70	32	-4.469	0
											KIT	ABL1	31	-4.268	1
											KIT	ACK	42	-3.958	0
											KIT	AKT1	28	-3.982	0
											KIT	AKT2	27	-4.437	0
											KIT	ALK	29	-3.801	0
											KIT	AurA	27	-3.785	0
											KIT	BMPR2	24	-4.729	0
											KIT	CaMK1a	26	-3.499	0
											KIT	CDK2	26	-4.476	0
											KIT	CDK7	27	-4.424	0
											KIT	CDK9	35	-4.242	0
											KIT	CHK1	30	-4.187	0
											KIT	DAPK1	26	-4.012	0
											KIT	EGFR	40	-4.849	0
											KIT	EphA2	40	-4.562	0
											KIT	EphA3	42	-4.535	0
											KIT	ErbB3	38	-3.696	0
											KIT	Erk2	38	-4.839	0
											KIT	Erk5	31	-4.147	0
											KIT	FGFR2	40	-5.239	0
											KIT	FGFR3	38	-6.495	0
											KIT	GSK3B	30	-5.747	0
											KIT	HGK	25	-4.126	1
											KIT	IGF1R	25	-3.379	0
											KIT	INSR	42	-5.005	1
											KIT	ITK	39	-3.03	0
											KIT	JAK2-b	30	-3.416	0
											KIT	JNK1	37	-3.704	0
											KIT	JNK3	37	-3.088	0
											KIT	KIT	100	-13.8	1
											KIT	LCK	44	-4.058	0
											KIT	LIMK1	29	-3.313	0
											KIT	MAP2K1	34	-4.281	0
											KIT	MAPKAPK2	28	-3.486	0
											KIT	MELK	29	-4.173	0
											KIT	MER	41	-3.141	0
											KIT	MET	46	-3.586	0
											KIT	MRCKb	26	-4.55	0
											KIT	MST2	32	-3.931	0
											KIT	MST3	30	-3.944	0
											KIT	p38g	35	-4.008	0
											KIT	PAK1	30	-4.351	0
											KIT	PAK4	35	-4.358	0
											KIT	PDK1	25	-3.889	0
											KIT	PIM1	25	-3.715	0
											KIT	PKACa	25	-4.689	0
											KIT	PKR	27	-3.164	0
											KIT	PLK1	27	-3.844	0
											KIT	RET	39	-5.713	1
											KIT	RIPK2	24	-4.339	0
											KIT	RSK1	28	-3.061	0
											KIT	SRC	42	-4.524	0
											KIT	SYK	45	-3.839	0
											KIT	TYK2	36	-4.953	0
											KIT	ZAP70	41	-2.877	0
											MAP2K1	ABL1	26	-4.259	0
											MAP2K1	ACK	26	-4.004	0
											MAP2K1	AKT1	28	-3.285	0
											MAP2K1	AKT2	29	-4.081	0
											MAP2K1	ALK	24	-3.498	0
											MAP2K1	AurA	28	-3.484	0
											MAP2K1	BMPR2	28	-3.909	0
											MAP2K1	CaMK1a	30	-4.912	0
											MAP2K1	CDK2	33	-3.976	0
											MAP2K1	CDK7	33	-4.354	0
											MAP2K1	CDK9	27	-4.491	0
											MAP2K1	CHK1	26	-3.092	1
											MAP2K1	DAPK1	23	-4.104	0
											MAP2K1	EGFR	27	-5.137	1
											MAP2K1	EphA2	27	-3.861	0
											MAP2K1	EphA3	30	-4.898	0
											MAP2K1	ErbB3	25	-4.594	0
											MAP2K1	Erk2	38	-5.742	0
											MAP2K1	Erk5	29	-4.454	0
											MAP2K1	FGFR2	28	-5.029	0
											MAP2K1	FGFR3	31	-3.924	0
											MAP2K1	GSK3B	30	-5.413	0
											MAP2K1	HGK	29	-6.098	1
											MAP2K1	IGF1R	27	-4.592	0
											MAP2K1	INSR	23	-5.601	0
											MAP2K1	ITK	29	-5.289	0
											MAP2K1	JAK2-b	31	-4.342	0
											MAP2K1	JNK1	27	-6.345	0
											MAP2K1	JNK3	23	-5.259	0
											MAP2K1	KIT	33	-4.281	0
											MAP2K1	LCK	26	-4.505	0
											MAP2K1	LIMK1	26	-3.116	0
											MAP2K1	MAP2K1	100	-13.2	1
											MAP2K1	MAPKAPK2	29	-4.062	0
											MAP2K1	MELK	25	-4.217	0
											MAP2K1	MER	26	-3.946	0
											MAP2K1	MET	25	-4.377	0
											MAP2K1	MRCKb	30	-3.697	0
											MAP2K1	MST2	36	-5.93	0
											MAP2K1	MST3	34	-4.613	0
											MAP2K1	p38g	28	-3.281	0
											MAP2K1	PAK1	25	-5.252	0
											MAP2K1	PAK4	26	-4.769	0
											MAP2K1	PDK1	30	-4.284	0
											MAP2K1	PIM1	40	-4.034	0
											MAP2K1	PKACa	29	-4.243	0
											MAP2K1	PKR	30	-5.076	0
											MAP2K1	PLK1	26	-3.464	0
											MAP2K1	RET	28	-4.479	0
											MAP2K1	RIPK2	26	-4.993	0
											MAP2K1	RSK1	34	-4.465	0
											MAP2K1	SRC	29	-6.497	0
											MAP2K1	SYK	26	-5.155	0
											MAP2K1	TYK2	26	-5.281	0
											MAP2K1	ZAP70	31	-5.804	0
											MAPKAPK2	ABL1	23	-3.576	0
											MAPKAPK2	ACK	25	-3.404	0
											MAPKAPK2	AKT1	33	-3.997	0
											MAPKAPK2	AKT2	34	-4.153	0
											MAPKAPK2	ALK	27	-2.82	0
											MAPKAPK2	AurA	32	-3.429	0
											MAPKAPK2	BMPR2	25	-3.905	0
											MAPKAPK2	CaMK1a	38	-5.88	0
											MAPKAPK2	CDK2	25	-4.476	0
											MAPKAPK2	CDK7	27	-4.602	0
											MAPKAPK2	CDK9	26	-3.649	0
											MAPKAPK2	CHK1	29	-3.44	0
											MAPKAPK2	DAPK1	34	-4.049	0
											MAPKAPK2	EGFR	25	-4.063	0
											MAPKAPK2	EphA2	25	-3.423	0
											MAPKAPK2	EphA3	26	-3.057	0
											MAPKAPK2	ErbB3	28	-2.796	0
											MAPKAPK2	Erk2	23	-3.477	0
											MAPKAPK2	Erk5	25	-3.051	0
											MAPKAPK2	FGFR2	27	-4.781	0
											MAPKAPK2	FGFR3	26	-3.777	0
											MAPKAPK2	GSK3B	29	-4.267	0
											MAPKAPK2	HGK	24	-4.143	0
											MAPKAPK2	IGF1R	23	-3.957	0
											MAPKAPK2	INSR	24	-3.972	0
											MAPKAPK2	ITK	24	-3.027	0
											MAPKAPK2	JAK2-b	29	-3.278	0
											MAPKAPK2	JNK1	26	-4.105	0
											MAPKAPK2	JNK3	26	-3.695	0
											MAPKAPK2	KIT	23	-3.486	0
											MAPKAPK2	LCK	22	-3.777	0
											MAPKAPK2	LIMK1	26	-2.162	0
											MAPKAPK2	MAP2K1	25	-4.062	0
											MAPKAPK2	MAPKAPK2	100	-11.4	1
											MAPKAPK2	MELK	32	-4.565	0
											MAPKAPK2	MER	21	-2.139	0
											MAPKAPK2	MET	26	-3.058	0
											MAPKAPK2	MRCKb	29	-3.983	0
											MAPKAPK2	MST2	29	-4.708	0
											MAPKAPK2	MST3	30	-4.51	0
											MAPKAPK2	p38g	26	-3.329	0
											MAPKAPK2	PAK1	29	-3.417	0
											MAPKAPK2	PAK4	29	-4.231	0
											MAPKAPK2	PDK1	29	-4.273	0
											MAPKAPK2	PIM1	32	-4	0
											MAPKAPK2	PKACa	32	-4.771	0
											MAPKAPK2	PKR	32	-3.621	0
											MAPKAPK2	PLK1	31	-3.932	0
											MAPKAPK2	RET	27	-3.272	0
											MAPKAPK2	RIPK2	28	-3.55	0
											MAPKAPK2	RSK1	35	-4.985	0
											MAPKAPK2	SRC	23	-4.027	0
											MAPKAPK2	SYK	24	-4.245	0
											MAPKAPK2	TYK2	29	-4.132	0
											MAPKAPK2	ZAP70	25	-4.17	0
											MET	ABL1	41	-4.029	0
											MET	ACK	37	-3.038	0
											MET	AKT1	27	-4.028	0
											MET	AKT2	26	-4.068	0
											MET	ALK	38	-3.32	0
											MET	AurA	25	-3.259	0
											MET	BMPR2	22	-4.699	0
											MET	CaMK1a	28	-3.206	0
											MET	CDK2	29	-4.237	0
											MET	CDK7	26	-4.173	0
											MET	CDK9	26	-5.158	1
											MET	CHK1	31	-3.309	0
											MET	DAPK1	28	-3.066	0
											MET	EGFR	38	-6.218	0
											MET	EphA2	39	-4.293	0
											MET	EphA3	37	-4.606	0
											MET	ErbB3	36	-5.307	1
											MET	Erk2	26	-4.282	0
											MET	Erk5	27	-3.769	0
											MET	FGFR2	37	-4.158	0
											MET	FGFR3	36	-4.792	1
											MET	GSK3B	24	-4.526	0
											MET	HGK	26	-4.333	1
											MET	IGF1R	39	-3.393	0
											MET	INSR	42	-5.834	0
											MET	ITK	37	-4.335	0
											MET	JAK2-b	34	-2.791	0
											MET	JNK1	25	-3.507	0
											MET	JNK3	26	-2.941	0
											MET	KIT	46	-3.586	0
											MET	LCK	36	-3.927	0
											MET	LIMK1	30	-2.972	0
											MET	MAP2K1	25	-4.377	0
											MET	MAPKAPK2	27	-3.058	0
											MET	MELK	25	-4.252	0
											MET	MER	41	-5.529	0
											MET	MET	100	-13.2	1
											MET	MRCKb	24	-4.152	0
											MET	MST2	27	-3.941	0
											MET	MST3	28	-4.102	0
											MET	p38g	27	-3.934	0
											MET	PAK1	26	-3.757	0
											MET	PAK4	26	-3.551	0
											MET	PDK1	24	-3.598	0
											MET	PIM1	24	-2.761	0
											MET	PKACa	24	-3.673	0
											MET	PKR	25	-2.902	0
											MET	PLK1	36	-3.183	0
											MET	RET	32	-4.829	1
											MET	RIPK2	27	-4.291	0
											MET	RSK1	28	-3.975	0
											MET	SRC	38	-5.798	1
											MET	SYK	36	-3.886	0
											MET	TYK2	34	-5.448	1
											MET	ZAP70	34	-4.674	0
											PLK1	ABL1	23	-3.836	0
											PLK1	ACK	27	-3.431	0
											PLK1	AKT1	32	-4.34	0
											PLK1	AKT2	32	-3.98	0
											PLK1	ALK	26	-2.627	0
											PLK1	AurA	33	-3.564	0
											PLK1	BMPR2	26	-3.07	0
											PLK1	CaMK1a	33	-3.683	0
											PLK1	CDK2	28	-5.355	0
											PLK1	CDK7	26	-4.082	0
											PLK1	CDK9	23	-4.371	0
											PLK1	CHK1	33	-3.638	0
											PLK1	DAPK1	32	-4.671	0
											PLK1	EGFR	29	-3.413	0
											PLK1	EphA2	24	-2.627	0
											PLK1	EphA3	27	-2.637	0
											PLK1	ErbB3	26	-2.599	0
											PLK1	Erk2	27	-4.842	0
											PLK1	Erk5	32	-3.885	0
											PLK1	FGFR2	26	-3.863	0
											PLK1	FGFR3	25	-3.842	0
											PLK1	GSK3B	24	-5.572	0
											PLK1	HGK	26	-4.515	0
											PLK1	IGF1R	26	-3.402	0
											PLK1	INSR	27	-3.929	0
											PLK1	ITK	25	-3.044	0
											PLK1	JAK2-b	32	-3.445	0
											PLK1	JNK1	31	-3.464	0
											PLK1	JNK3	31	-2.663	0
											PLK1	KIT	27	-3.844	0
											PLK1	LCK	24	-3.455	0
											PLK1	LIMK1	26	-2.123	0
											PLK1	MAP2K1	26	-3.464	0
											PLK1	MAPKAPK2	31	-3.932	0
											PLK1	MELK	35	-5.244	0
											PLK1	MER	29	-2.761	0
											PLK1	MET	36	-3.183	0
											PLK1	MRCKb	30	-3.738	0
											PLK1	MST2	30	-3.473	0
											PLK1	MST3	30	-3.946	0
											PLK1	p38g	30	-5.425	0
											PLK1	PAK1	27	-3.467	0
											PLK1	PAK4	31	-3.554	0
											PLK1	PDK1	32	-3.281	0
											PLK1	PIM1	25	-3.623	0
											PLK1	PKACa	31	-4.77	0
											PLK1	PKR	30	-4.103	0
											PLK1	PLK1	100	-12.6	1
											PLK1	RET	23	-3.354	0
											PLK1	RIPK2	27	-4.741	0
											PLK1	RSK1	33	-4.095	0
											PLK1	SRC	25	-3.847	0
											PLK1	SYK	24	-3.672	0
											PLK1	TYK2	29	-4.581	0
											PLK1	ZAP70	27	-3.09	0
											RET	ABL1	38	-4.352	1
											RET	ACK	34	-5.304	0
											RET	AKT1	25	-4.886	0
											RET	AKT2	26	-4.471	0
											RET	ALK	31	-2.926	0
											RET	AurA	22	-5.39	1
											RET	BMPR2	25	-5.741	0
											RET	CaMK1a	26	-3.609	0
											RET	CDK2	25	-5.092	0
											RET	CDK7	25	-3.991	0
											RET	CDK9	22	-4.362	0
											RET	CHK1	28	-5.197	0
											RET	DAPK1	24	-4.228	0
											RET	EGFR	34	-4.901	0
											RET	EphA2	37	-4.977	0
											RET	EphA3	30	-4.669	0
											RET	ErbB3	30	-4.755	0
											RET	Erk2	31	-4.35	0
											RET	Erk5	25	-3.637	0
											RET	FGFR2	46	-7.8	0
											RET	FGFR3	50	-7.803	0
											RET	GSK3B	22	-5.799	0
											RET	HGK	24	-4.294	1
											RET	IGF1R	39	-3.345	0
											RET	INSR	38	-4.776	0
											RET	ITK	32	-3.988	0
											RET	JAK2-b	33	-4.234	0
											RET	JNK1	31	-2.927	0
											RET	JNK3	31	-3.026	0
											RET	KIT	34	-5.713	1
											RET	LCK	39	-4.83	0
											RET	LIMK1	27	-4.06	0
											RET	MAP2K1	26	-4.479	0
											RET	MAPKAPK2	27	-3.272	0
											RET	MELK	25	-4.567	0
											RET	MER	39	-3.771	1
											RET	MET	32	-4.829	0
											RET	MRCKb	21	-3.96	0
											RET	MST2	25	-4.395	0
											RET	MST3	27	-5.275	0
											RET	p38g	26	-3.612	0
											RET	PAK1	23	-5.009	0
											RET	PAK4	23	-4.747	0
											RET	PDK1	28	-4.975	0
											RET	PIM1	28	-4.454	0
											RET	PKACa	25	-5.172	0
											RET	PKR	25	-3.96	0
											RET	PLK1	23	-3.354	0
											RET	RET	100	-12	1
											RET	RIPK2	26	-5.331	0
											RET	RSK1	28	-4.783	0
											RET	SRC	37	-5.371	1
											RET	SYK	37	-5.574	0
											RET	TYK2	34	-7.047	0
											RET	ZAP70	33	-4.172	0
											SRC	ABL1	44	-6.878	1
											SRC	ACK	38	-5.254	0
											SRC	AKT1	25	-4.299	0
											SRC	AKT2	25	-4.525	0
											SRC	ALK	38	-3.929	0
											SRC	AurA	23	-4.853	0
											SRC	BMPR2	24	-4.101	0
											SRC	CaMK1a	26	-4.666	0
											SRC	CDK2	29	-5.09	0
											SRC	CDK7	29	-5.031	1
											SRC	CDK9	28	-5.573	0
											SRC	CHK1	31	-4.147	0
											SRC	DAPK1	27	-3.73	0
											SRC	EGFR	36	-6.474	0
											SRC	EphA2	41	-6.164	0
											SRC	EphA3	45	-5.84	0
											SRC	ErbB3	37	-6.721	0
											SRC	Erk2	28	-4.042	0
											SRC	Erk5	25	-3.548	0
											SRC	FGFR2	36	-6.239	0
											SRC	FGFR3	35	-7.281	0
											SRC	GSK3B	27	-5.152	0
											SRC	HGK	26	-5.536	0
											SRC	IGF1R	40	-4.387	0
											SRC	INSR	38	-5.159	0
											SRC	ITK	38	-5.901	1
											SRC	JAK2-b	30	-4.893	0
											SRC	JNK1	27	-5.039	1
											SRC	JNK3	27	-4.216	0
											SRC	KIT	41	-4.524	0
											SRC	LCK	60	-7.08	1
											SRC	LIMK1	34	-4.67	0
											SRC	MAP2K1	29	-6.497	1
											SRC	MAPKAPK2	23	-4.027	0
											SRC	MELK	29	-4.102	0
											SRC	MER	38	-4.428	0
											SRC	MET	38	-5.798	1
											SRC	MRCKb	28	-4.192	0
											SRC	MST2	26	-5.34	1
											SRC	MST3	31	-6.561	1
											SRC	p38g	28	-3.966	0
											SRC	PAK1	27	-4.931	0
											SRC	PAK4	25	-5.449	0
											SRC	PDK1	27	-4.453	0
											SRC	PIM1	31	-3.836	0
											SRC	PKACa	24	-4.491	0
											SRC	PKR	22	-3.973	0
											SRC	PLK1	25	-3.847	0
											SRC	RET	37	-5.371	1
											SRC	RIPK2	28	-5.847	1
											SRC	RSK1	25	-5.977	1
											SRC	SRC	100	-13.2	1
											SRC	SYK	37	-3.811	0
											SRC	TYK2	34	-6.431	1
											SRC	ZAP70	32	-5.006	1
