# Supplementary material for: Computational analysis of kinase inhibitor selectivity using structural knowledge
Source: Oxford University Press journal article supplement (doi:10.1093/bioinformatics/bty582), 2018-07-06
Supplement: bioinformatics_35_2_235_s8.xlsx [file bioinformatics_35_2_235_s8.xlsx]

## Sheet: Sheet1
Compound Number	Target	HNR Rank	HNR Scores	Kinome Rank	Kinome Scores	Max. Dosing (µM)
18	PIM1/2	1	-8.78,-7.37	1	-9.22,-7.98*	0.1
19	PIM1/2	1	-9.12	1	-9.82	0.1
20	PIM1/2	1	-8.35,-7.42*	1	-9.48,-8.41*	0.1
21	JAK	1	-8.32,-7.34*	1	-9.38	1
22	JAK	1	-9.15	1	-10.07	0.1
23	JAK	1	-7.27	1	-10.1	1
24	cMet	1	-11.48	1	-14.74	0.1
25	cMet	1	-8.57	1	-11.39	1
26	B-Raf	1	-11.33	1	-10.07	0.1
27	B-Raf	1	-8.51	1	-11.28	1
28	PI3K	1	-9.23,-7.64*	1	-7.40,-7.90*	1
*Homologous Structure
