# Supplementary material for: Computational analysis of kinase inhibitor selectivity using structural knowledge
Source: Oxford University Press journal article supplement (doi:10.1093/bioinformatics/bty582), 2018-07-06
Supplement: bioinformatics_35_2_235_s9.xlsx [file bioinformatics_35_2_235_s9.xlsx]

## Sheet: Supplementary_Table8
Kinases/Compounds	18	19	20	21	22	23	24	25	26	27	28
AKT1	-4.1115	-3.555	-3.7385	-4.388	-4.306	-4.301	-3.648	-4.306	-2.977	-3.137	-2.8925
AKT2	-3.1975	-3.444	-3.691	-3.834	-3.798	-3.632	-3.8	-3.967	-3.644	-3.476	-3.062
ALK	-5.0485	-5.433	-5.061	-5.8445	-5.853	-5.245	-6.684	-6.88	-3.887	-3.887	-2.935
ACVR1	-3.1355	-3.29	-3.5	-4.1405	-3.88	-3.817	-3.703	-3.482	-3.252	-4	-2.7785
ASK1	-4.081	-4.143	-4.3105	-5.523	-5.056	-5.239	-4.093	-3.644	-2.53	-3.446	-3.089
ABL	-4.1755	-4.236	-4.4535	-4.8705	-5.592	-4.4	-6.127	-6.972	-4.513	-4.023	-3.361
ARG	-3.433	-2.959	-3.289	-4.322	-3.589	-4.395	-4.946	-5.639	-3.847	-4.052	-2.8725
AURKA	-5.5925	-5.907	-5.8895	-5.911	-5.918	-6.275	-5.273	-5.135	-3.615	-4.515	-3.4215
BRAF	-4.347	-4.734	-4.4165	-5.0825	-5.416	-5.471	-5.262	-5.408	-11.392	-11.276	-3.2355
BTK	-3.9605	-3.883	-3.7735	-5.202	-4.719	-4.972	-6.507	-7.346	-4.152	-4.435	-3.5655
BMX	-2.585	-2.822	-2.874	-3.981	-4.03	-3.923	-4.244	-3.878	-3.444	-3.899	-2.561
CDK2	-4.696	-4.747	-4.838	-4.6665	-5.132	-4.439	-4.648	-4.986	-3.481	-4.388	-3.2245
CHK1	-4.916	-5.395	-4.8875	-4.9265	-4.69	-5.213	-4.396	-4.162	-4.32	-3.899	-2.9935
CHK2	-5.551	-5.327	-5.027	-4.5725	-3.978	-4.121	-3.387	-3.02	-2.871	-3.289	-3.104
CSNK1D	-4.326	-4.181	-4.3865	-4.4865	-5.217	-4.66	-4.281	-3.519	-2.693	-3.547	-3.8035
CSNK1G3	-3.9025	-3.72	-3.407	-3.706	-3.898	-4.257	-2.8	-3.461	-2.922	-2.716	-3.534
CSNK2A1	-4.472	-4.409	-4.3425	-4.033	-4.513	-4.184	-4.26	-3.438	-2.992	-3.511	-3.7745
CSNK2A2	-3.8185	-4.062	-3.604	-3.329	-3.684	-3.486	-2.561	-2.793	-2.955	-2.944	-3.3905
CLK1	-4.464	-4.507	-4.525	-4.064	-4.37	-3.613	-3.149	-2.761	-2.912	-3.157	-2.7035
CLK2	-4.449	-4.944	-4.091	-4.124	-3.672	-3.909	-3.228	-2.582	-2.706	-2.923	-2.732
CLK3	-4.2215	-4.952	-4.497	-4.4195	-4.509	-3.435	-3.042	-3.299	-3.25	-3.365	-2.887
CSF1R	-4.094	-4.449	-4.2135	-5.443	-5.233	-4.932	-5.702	-5.632	-4.405	-5.13	-2.927
CAMK1	-3.4945	-4.063	-3.819	-4.6425	-4.369	-4.019	-3.781	-3.877	-2.851	-3.107	-2.9425
CAMK2A	-3.872	-3.674	-3.9075	-4.1565	-4.33	-3.241	-3.473	-3.63	-2.975	-2.889	-2.732
COT	-3.88	-3.492	-3.5875	-5.061	-5.359	-4.93	-3.249	-3.899	-3.492	-3.44	-2.94
DAPK1	-5.7175	-5.682	-5.8765	-4.696	-4.735	-4.173	-4.109	-3.779	-3.841	-3.586	-3.0885
DYRK1A	-4.67	-5.45	-5.0145	-5.0455	-4.771	-5.082	-4.244	-4.08	-3.395	-3.529	-3.7205
EGFR	-4.1345	-4.546	-4.2125	-5.188	-6.005	-5.059	-4.846	-5.496	-4.456	-4.663	-3.252
ERK1	-4.6685	-4.407	-4.326	-3.8415	-4.102	-4.481	-3.062	-4.497	-3.668	-3.816	-2.838
ERK2	-5.4555	-5.017	-4.9255	-4.652	-5.183	-4.396	-3.733	-4.323	-3.672	-3.687	-3.6575
EPHA3	-3.5485	-3.922	-3.9575	-4.5405	-4.156	-5.282	-6.938	-6.546	-4.288	-4.218	-3.5575
EPHA7	-3.539	-4.059	-3.7215	-3.7815	-4.039	-3.946	-6.145	-6.074	-3.151	-4.081	-3.123
EPHB3	-2.82	-2.996	-2.8765	-3.079	-3.622	-2.838	-3.086	-3.67	-2.587	-3.663	-2.793
EPHB4	-4.274	-4.47	-4.235	-4.75	-4.724	-4.016	-4.108	-4.186	-4.043	-4.348	-2.79
ERBB2	-3.2495	-3.514	-3.6885	-4.1575	-4.505	-4.327	-4.008	-4.666	-3.74	-4.412	-2.988
ERBB4	-3.324	-3.427	-3.3285	-4.2095	-3.981	-3.941	-4.07	-4.591	-4.157	-4.126	-2.931
FAK	-3.685	-3.875	-3.751	-4.887	-5.115	-4.697	-5.498	-6.081	-3.511	-3.608	-3.322
FAK2	-3.4315	-3.896	-3.9595	-5.4385	-5.428	-5.184	-5.234	-5.441	-3.213	-3.592	-2.855
FGFR2	-4.754	-4.59	-4.8305	-6.249	-6.035	-6.863	-4.378	-5.067	-3.063	-3.193	-2.985
FGFR4	-4.617	-4.426	-4.3785	-4.108	-4.994	-4.124	-5.92	-6.551	-3.618	-3.839	-2.8765
FES	-4.3845	-4.982	-4.4315	-5.7675	-5.765	-5.578	-4.512	-4.181	-2.807	-2.871	-3.4485
FLT1	-3.685	-3.855	-3.6705	-3.5245	-3.008	-3.078	-4.097	-4.824	-3.305	-3.352	-2.6815
FLT3	-3.458	-3.674	-3.294	-4.2235	-3.697	-3.88	-6.37	-6.151	-2.607	-3.048	-2.7695
FYN	-4.5095	-4.061	-4.855	-4.32	-4.908	-4.688	-3.892	-3.917	-2.693	-3.381	-3.202
GRK4	-4.3655	-4.275	-4.097	-3.6805	-3.683	-3.154	-3.07	-3.2	-2.854	-2.729	-3.077
GSK3B	-5.7665	-6.329	-5.9635	-5.4225	-4.994	-5.417	-4.386	-4.652	-3.49	-3.895	-3.604
GSG2	-4.06	-3.969	-4.126	-3.966	-4.253	-3.771	-3.717	-3.785	-2.818	-3.644	-2.904
HCK	-4.443	-4.567	-4.7405	-5.456	-5.485	-5.437	-4.397	-4.476	-4.333	-5.251	-3.0655
IGF1R	-3.4865	-3.583	-3.909	-4.683	-5.085	-4.612	-6.726	-6.44	-4.199	-4.253	-2.924
IRAK4	-4.2815	-4.127	-4.274	-5.2295	-5.3	-5.549	-5.606	-4.538	-3.256	-3.651	-3.1395
ITK	-3.422	-4.096	-3.7525	-4.9115	-4.748	-4.815	-4.453	-4.697	-3.685	-3.809	-3.1775
JAK2	-4.378	-4.293	-4.554	-9.0985	-8.417	-10.1	-5.573	-6.193	-3.671	-3.914	-3.3115
JNK1	-3.8855	-3.956	-4.3545	-4.3265	-4.44	-4.298	-3.205	-3.443	-2.898	-3.026	-2.74
JNK2	-3.92	-3.932	-3.602	-3.57	-4.163	-3.775	-4.941	-5.869	-3.971	-4.025	-2.536
JNK3	-3.9665	-3.804	-4.3795	-4.3355	-4.209	-4.645	-4.577	-4.641	-3.721	-3.419	-3.096
KDR	-4.1265	-4.753	-4.186	-4.914	-4.71	-4.481	-5.625	-6.131	-4.639	-4.5	-3.151
KIT	-3.637	-3.85	-3.697	-4.2405	-5.084	-4.266	-4.984	-5.068	-4.164	-4.026	-2.6945
LIMK1	-3.3785	-3.567	-3.2535	-4.557	-3.918	-4.713	-4.054	-3.784	-2.534	-3.352	-3.369
LCK	-4.297	-4.388	-4.359	-5.878	-5.108	-5.593	-6.104	-6.676	-4.608	-5.149	-3.616
MAP4K4	-4.4845	-4.445	-4.1825	-5.3495	-5.534	-5.068	-3.938	-4.253	-3.579	-3.522	-3.129
MAPKAPK2	-4.516	-4.839	-4.777	-5.107	-4.866	-5.115	-3.583	-3.572	-3.123	-3.54	-3.2975
MARK2	-4.263	-4.535	-4.579	-4.7995	-4.3	-4.671	-4.173	-3.951	-2.596	-3.323	-3.356
MARK4	-5.0995	-4.905	-4.95	-5.1285	-5.306	-5.003	-3.944	-4.191	-3.161	-2.859	-3.28
MEK1	-4.711	-4.349	-4.586	-5.802	-5.501	-5.567	-4.218	-4.807	-3.802	-3.706	-3.351
MELK	-4.55	-5.254	-4.569	-4.6395	-3.888	-4.218	-4.833	-5.041	-3.962	-3.287	-3.309
MKK6	-3.149	-3.19	-2.835	-4.4175	-4.375	-4.419	-3.607	-3.545	-2.618	-3.105	-2.514
CDC42BPB	-4.127	-4.56	-4.4785	-4.13	-3.902	-4.361	-4.688	-4.58	-2.994	-3.371	-3.4375
MST3	-4.8345	-4.503	-4.591	-6.4465	-6.143	-5.965	-4.673	-4.636	-3.689	-3.826	-4.2535
MER	-4.025	-3.882	-4.371	-4.2405	-4.638	-3.823	-5.55	-6.223	-2.611	-3.208	-2.826
MET	-4.1165	-3.835	-3.8095	-4.031	-4.559	-4.334	-14.743	-13.486	-3.851	-4.246	-3.499
NEK2	-2.928	-3.219	-2.978	-4.213	-3.96	-4.623	-4.138	-4.347	-3.304	-3.53	-3.64
NIK	-4.1395	-3.5	-3.91	-5.3895	-5.991	-5.196	-3.118	-3.221	-2.935	-3.156	-3.009
PAK1	-3.8395	-3.739	-3.946	-5.7485	-5.131	-5.66	-4.89	-4.836	-3.697	-4.342	-3.506
PAK4	-4.421	-4.066	-4.61	-5.0825	-5.469	-5.082	-3.922	-4.088	-3.286	-3.677	-3.234
PAK6	-3.2635	-3.336	-3.258	-5.252	-5.178	-5.018	-3.792	-3.875	-2.662	-2.717	-2.843
PDK1	-4.69	-5.324	-5.019	-5.084	-4.923	-5.329	-4.67	-4.414	-3.417	-3.687	-3.456
PIK3CG	-3.268	-3.095	-3.047	-3.18	-3.276	-3.404	-3.3	-3.348	-3.511	-3.619	-7.6465
PIM1	-8.5965	-9.821	-8.942	-4.4595	-4.469	-4.865	-3.693	-3.691	-2.986	-3.239	-3.101
PRKACA	-3.7945	-4.395	-4.215	-5.362	-5.275	-5.703	-4.364	-4.574	-2.776	-3.836	-3.1805
PRKCA	-3.904	-4.287	-4.057	-3.866	-3.243	-4.119	-3.37	-3.77	-2.886	-3.105	-2.704
PRKCB	-3.5905	-4.411	-3.9785	-4.022	-3.494	-4.394	-3.888	-3.876	-2.659	-2.906	-3.1025
PRKCI	-4.447	-4.594	-4.5385	-4.6805	-3.883	-4.952	-4.869	-4.35	-3.338	-3.216	-3.1515
PRKCQ	-4.8235	-4.847	-5.425	-5.103	-5.302	-5.687	-4.133	-3.599	-3.465	-3.489	-3.175
PLK1	-4.111	-4.337	-4.2215	-4.9355	-4.959	-3.83	-2.97	-3.238	-3.22	-4.243	-2.622
PRK1	-3.897	-4.154	-4.0055	-4.7295	-4.824	-4.643	-4.499	-4.423	-3.043	-2.923	-2.6605
RIPK2	-4.377	-4.078	-4.242	-4.8	-4.411	-5.107	-5.562	-6.221	-4.728	-4.369	-3.6455
ROCK1	-4.418	-4.596	-4.924	-4.7325	-4.548	-4.877	-5.261	-5.347	-2.849	-3.384	-3.425
ROCK2	-4.074	-4.205	-4.164	-4.324	-4.38	-4.255	-3.866	-4.408	-3.014	-3.076	-2.7215
RSK1	-4.297	-4.336	-4.372	-5.2585	-5.013	-4.341	-3.543	-4.033	-2.749	-3.513	-2.827
RSK2	-4.015	-4.407	-4.2595	-4.9735	-5.037	-4.383	-3.31	-3.665	-3.272	-3.782	-2.926
RET	-4.0975	-4.581	-4.6575	-5.2695	-5.635	-5.906	-3.829	-4.088	-3.004	-3.832	-2.5815
SGK1	-4.077	-4.086	-4.3125	-4.399	-4.346	-4.248	-3.857	-3.918	-3.194	-2.841	-2.75
SRC	-4.2535	-4.296	-4.4765	-5.756	-5.423	-6.289	-4.424	-4.946	-3.597	-3.96	-3.425
SYK	-4.386	-4.367	-4.4115	-5.9465	-5.82	-5.192	-6.191	-6.632	-3.856	-3.875	-3.1855
TAK1	-3.866	-3.752	-4.0595	-5.4605	-5.321	-5.884	-3.538	-3.498	-2.702	-2.726	-3.145
TBK1	-3.162	-3.133	-3.594	-4.708	-4.39	-4.708	-4.11	-3.856	-2.682	-2.668	-3.196
TGFBR1	-3.929	-3.802	-3.989	-4.936	-4.842	-4.669	-4.673	-4.677	-4.236	-4.531	-3.753
TTK	-4.3375	-4.156	-4.2545	-4.5995	-4.287	-4.328	-4.594	-4.443	-2.93	-3.916	-3.1945
TYK2	-4.7605	-4.614	-4.1685	-7.7335	-8.407	-7.834	-4.195	-4.723	-3.437	-3.876	-2.962
TIE2	-4.513	-4.612	-4.425	-4.96	-5.115	-5.3	-5.884	-7.19	-3.342	-4.131	-2.868
TRKA	-3.89	-4.13	-3.9395	-5.365	-5.679	-4.854	-6.702	-6.611	-3.313	-3.906	-2.976
TRKB	-3.69	-3.179	-3.643	-4.336	-4.257	-4.643	-5.897	-6.277	-3.324	-3.448	-3.239
TRKC	-3.4845	-3.608	-3.5015	-4.506	-4.644	-4.061	-5.674	-6.36	-3.521	-3.756	-2.777
WEE1	-3.403	-4.1	-3.6435	-4.528	-3.965	-4.991	-3.559	-3.91	-3.885	-4.663	-3.2825
YSK1	-3.7835	-3.143	-3.508	-5.3995	-5.209	-4.351	-3.578	-3.89	-2.985	-3.211	-3.3955
ZAP70	-4.1805	-4.959	-3.918	-5.193	-5.288	-5.395	-3.521	-3.625	-2.839	-3.826	-3.0315
ZIPK	-4.7725	-5.126	-5.447	-3.754	-3.597	-3.607	-3.392	-3.176	-3.215	-3.47	-3.376
MAPK14	-4.8925	-5.399	-4.8295	-4.1105	-4.376	-4.068	-7.02	-6.516	-5.115	-5.271	-3.589
MAPK11	-3.75	-3.639	-3.402	-3.4525	-2.701	-3.253	-5.167	-5.215	-4.057	-4.293	-3.1395
MAPK12	-3.8365	-4.438	-3.9005	-3.3475	-3.55	-3.832	-3.127	-3.669	-2.787	-3.036	-3.024
RPS6KB1	-4.992	-4.388	-5.26	-4.8745	-5.428	-5.216	-4.266	-4.267	-2.639	-3.286	-3.682
