# Supplementary material for: Computational analysis of kinase inhibitor selectivity using structural knowledge
Source: Oxford University Press journal article supplement (doi:10.1093/bioinformatics/bty582), 2018-07-06
Supplement: bioinformatics_35_2_235_s10.xlsx [file bioinformatics_35_2_235_s10.xlsx]

## Sheet: Supplementary_Table9
Kinases/Compounds	18	19	20	21	22	23	24	25	26	27	28
AKT1	3	1.09	0.54	3	1.04	1.33	-0.34	0.12	1.28	3	1.51
AKT2	0.63	3	1.09	1.24	3	0.96	3	3	1.38	3	1.28
ALK	3	3	3	3	3	3	0.51	3	3	0.58	1.69
ACVR1	3	0.48	3	1.47	-0.06	1.59	3	3	0.48	3	3
ASK1	3	0	1.52	0.83	0.38	2.7	3	3	2	3	3
ABL	3	0.37	3	3	-0.3	0.9	0.28	3	0.6	1.38	1.28
ARG	3	3	3	3	3	1.11	-0.28	0.51	0.6	1.19	2
AURKA	1.4	-0.07	3	0.37	-0.59	0.21	-0.95	-0.73	0.35	2	3
BRAF	3	3	1.09	0.43	0.71	0.92	-1.03	-0.61	-1.69	-1.09	0.79
BTK	3	0.92	3	1.17	-0.13	1.3	0.06	-0.05	1	1.06	1.51
BMX	-0.16	0.85	0.43	0.86	-0.17	1	0.06	-0.31	0.83	1.12	1.69
CDK2	-0.46	-0.6	-1.56	0.94	0.14	0.65	3	-0.13	1.06	1.69	1.69
CHK1	-0.68	-1.6	-1.31	3	-0.09	1.02	3	3	1.06	1.51	1.69
CHK2	0.19	-0.04	3	1.61	-0.21	1.61	3	-0.09	1	3	1.51
CSNK1D	1.7	3	3	1.95	0.85	1.16	3	1	0.5	1.38	1.69
CSNK1G3	-0.05	3	3	1.02	2	1.57	3	3	0.31	1.69	1.69
CSNK2A1	2	0.82	0.36	1.05	0.12	1.47	3	0.28	1.69	1.06	1.51
CSNK2A2	0.11	3	3	0.89	0.82	1.02	3	3	3	1.51	1.51
CLK1	0.31	-0.03	0.14	0.97	0.1	1.22	-0.05	0.06	3	1.06	2
CLK2	0.39	-0.31	0.54	1.24	3	0.9	3	0.69	1	0.83	1.19
CLK3	0.09	0.1	0.2	1.21	3	0.69	3	0.28	2	3	1.28
CSF1R	0.39	1.52	0.43	-0.48	-1.68	0.85	-0.09	-0.42	0.14	0.29	2
CAMK1	3	3	3	3	0.71	3	-0.25	3	1.51	1.19	3
CAMK2A	-0.11	-0.09	-0.01	1.24	3	0.57	3	3	3	1.69	1
COT	0.85	-0.43	0.1	1.02	-0.63	0.94	0.28	0.38	1.38	1.06	0.83
DAPK1	0	0.07	3	0.45	3	1.74	3	0.06	1	2	3
DYRK1A	-0.44	0.08	-0.1	1.71	3	1.47	3	0.51	1.69	3	2
EGFR	0.59	3	3	3	-0.02	3	3	3	0.87	3	1.69
ERK1	3	3	3	0.8	0.36	1.01	3	3	2	3	1.28
ERK2	1.7	0.24	0.71	1.95	-0.27	3	3	0.19	1.24	3	1.51
EPHA3	0.85	-0.17	0.05	1.59	0.44	1.39	3	-0.28	3	1.69	2
EPHA7	0.61	0.11	0.18	1.14	0.74	1.17	3	3	0.66	3	3
EPHB3	0.04	1.09	3	1.51	0.49	0.94	0.51	0.06	1.28	1.69	1.69
EPHB4	0.61	3	3	0.99	0.31	0.98	0.28	-0.25	0.95	2	3
ERBB2	3	1.22	3	3	0.07	3	3	3	1.12	0.6	1.28
ERBB4	3	3	3	1.24	3	1.85	3	0	-0.03	1	2
FAK	0.19	1.04	3	1.04	0.42	1.26	3	0	1.19	1.19	1.69
FAK2	0.14	3	3	0.79	3	1.14	3	3	1.28	3	3
FGFR2	1.3	3	3	0.63	-0.17	0.29	1	3	0.07	1	3
FGFR4	0.92	0.31	0.56	0.57	-0.07	1.31	3	-0.28	0.58	3	0.79
FES	3	0.22	0.19	2.09	0.38	0.57	3	-0.31	3	2	3
FLT1	0.74	3	3	0.88	-0.19	1.48	1	0.38	0.72	3	1.28
FLT3	3	-0.19	0.04	0.29	-0.83	0.24	-1.87	-1.55	0.69	-0.03	1.12
FYN	0.38	3	3	1.04	0.24	0.33	0.51	0.06	1.19	0.52	3
GRK4	2	3	3	3	0.61	3	-0.73	1	0.83	3	2
GSK3B	-1.2	0.79	-0.77	3	0.38	1.27	1	0.69	1	3	3
GSG2	0.51	3	3	3	0.3	1.19	3	3	3	3	1.69
HCK	3	3	3	0.65	0.63	0.75	0	-0.21	0.91	0.63	3
IGF1R	0.23	0.51	0.21	0.6	0.19	0.88	1	-0.28	0.91	1	2
IRAK4	0.67	3	3	3	-0.16	1.54	-0.67	3	3	3	1.69
ITK	3	1.22	0.34	0.88	0.01	0.92	3	0.69	3	1.51	1.12
JAK2	1.09	0.21	0.54	-0.4	-2.31	-2	0.51	3	3	2	3
JNK1	3	-0.01	0.25	1.29	-0.15	1.02	0.69	-0.25	3	0.87	1.51
JNK2	3	0.28	0.31	3	3	3	3	3	-0.19	3	3
JNK3	0.92	0.04	1.09	0.71	3	0.72	3	3	1.28	1.38	1.19
KDR	3	0.23	0.31	0.31	-0.43	0.5	-0.13	-0.34	-0.07	1.19	3
KIT	0.34	-0.06	0.12	0.72	-0.3	3	-0.05	0.51	1	0.5	1.28
LIMK1	0.1	-0.21	0.33	0.99	0.57	0.75	3	3	-0.69	3	3
LCK	-0.01	0.24	0.32	3	-0.39	-0.33	-1.29	-0.88	-0.55	-0.1	1.69
MAP4K4	-1.8	-2.03	-1.2	0.36	-0.56	1.12	1	-0.55	0.29	3	2
MAPKAPK2	0.52	0.51	0.67	0.95	-0.14	1.21	0.25	0.38	1.28	3	1.38
MARK2	-0.02	3	3	1.17	3	-0.17	3	0	1.38	1.12	1.06
MARK4	-0.58	3	3	1.12	3	-0.24	3	3	1.12	3	0.83
MEK1	-0.2	0.49	2	0.11	-0.17	1.69	-0.76	-0.59	0.55	1.28	1
MELK	0.12	-0.6	-0.34	0.56	-0.1	0.5	3	3	0.95	3	1
MKK6	0.49	0.1	0.33	0.76	3	1.63	1	-0.25	1.06	1.69	3
CDC42BPB	-1.13	0.02	0.95	3	0.38	2.52	3	0.69	1	3	3
MST3	-0.2	0.09	-0.37	1.52	0.79	1.2	0.38	0.38	0.6	1.38	3
MER	3	0.54	0.25	1.03	3	1.04	-2.38	-2.38	1.06	3	3
MET	0.18	0.67	3	0.75	0.1	3	-2.18	-1.21	1.38	1.12	3
NEK2	3	3	3	0.87	-0.31	1.37	3	0	1.06	1.69	1.12
NIK	2	3	3	1.85	0.65	1.31	3	3	1.69	3	3
PAK1	0.49	0.76	0.04	0.68	1.09	1.04	3	3	0.69	3	3
PAK4	3	0.39	0.28	3	-0.45	0.98	3	3	0.63	1.38	1.38
PAK6	3	0.45	0.31	1.23	0.22	3	3	0.12	1.69	1.12	1.51
PDK1	-1.22	-0.39	-0.13	0.66	0.08	0.58	-0.25	0.38	0.35	1.51	0.95
PIK3CG	0.69	2	3	3	0.03	1.31	3	3	3	1.19	-1
PIM1	-3.15	-2.14	-3.04	1.1	3	3	3	0.51	3	1.69	3
PRKACA	3	3	3	3	0.25	0.55	1	0.51	0.66	3	3
PRKCA	0.29	0.52	1.4	0.95	0.14	0.38	-0.25	0.12	0.95	3	0.79
PRKCB	-0.16	0.33	0.29	1.09	3	0.53	-0.13	-0.31	0.95	0.95	3
PRKCI	0.17	0.26	0.05	0.46	0.29	1.67	-0.34	0.38	1.51	1.51	1.38
PRKCQ	-0.35	0.09	0.2	1.16	3	1.31	0.38	3	1.38	1.19	1.51
PLK1	-0.24	-0.11	1.09	0.93	0.04	1.04	-0.28	3	0.63	1.28	1.69
PRK1	-0.01	-0.13	0.67	0.89	-0.19	-0.81	1	0.06	3	1.19	0.75
RIPK2	-0.01	-0.04	3	3	0.74	1.79	3	3	-1.19	3	3
ROCK1	-0.13	0.63	1.15	1.21	3	0.24	0.19	0.69	0.83	3	0.95
ROCK2	-0.27	-0.03	0.61	1.1	-0.01	0.31	0.69	-0.09	1.69	1.69	3
RSK1	0.74	0.31	0.3	0.88	-0.15	0.64	0	0.51	1.69	1.51	1.51
RSK2	3	0.42	0.85	0.71	0.14	0.78	3	0.12	1.38	3	1.38
RET	3	0.61	0.67	0.01	-0.76	0.43	0.19	-0.13	0.41	1.06	1
SGK1	3	0.57	0.85	1.88	0.95	0.62	3	3	0.5	1.69	1.51
SRC	3	0.1	-0.03	1.04	-0.13	0.63	-0.4	-0.25	0.91	0.55	0.95
SYK	3	0.27	0.12	0.89	0.26	2.4	3	3	1.06	3	1.38
TAK1	-0.22	0.34	3	1.03	-0.04	1.13	3	3	0.95	3	3
TBK1	-0.31	-0.03	0.14	0.59	0.43	0.35	3	0.28	1.51	1.38	3
TGFBR1	0.12	3	0.32	3	3	3	3	3	3	3	3
TTK	0.17	0.22	0.44	3	-0.06	1.1	3	3	1.38	3	3
TYK2	0.31	2	0.95	-1.24	-3.09	-1.63	3	3	1.51	3	3
TIE2	3	0.25	0.34	3	-0.02	1.49	3	0.28	0.1	1	1
TRKA	3	-0.11	0.17	0.27	-0.58	3	-1.43	-1.43	0.95	0.55	0.5
TRKB	3	0.76	-0.24	0.62	-0.31	1.05	-1.25	-1.52	0.95	1	0.72
TRKC	0.76	3	3	0.41	-0.35	0.38	-1.6	3	1.06	0.52	3
WEE1	0.43	0.16	3	3	3	1.44	3	3	3	3	3
YSK1	-0.35	0.15	0.39	0.72	0.21	0.67	3	1	1.69	3	1.19
ZAP70	3	0.61	3	1.33	3	1.16	0.19	3	0.91	1.19	0.79
ZIPK	-0.01	-0.29	0.11	1.34	-0.21	1.88	0.06	3	1.12	3	3
MAPK14	3	0.2	0.4	1.35	0.12	0.96	3	3	3	3	3
MAPK11	0.14	0.36	0.44	0.77	0.24	0.77	0.69	3	0.91	1.51	1.51
MAPK12	-0.58	0.24	-0.12	1.09	3	1.13	3	0.19	0.75	0.87	0.91
RPS6KB1	3	0.08	0.85	0.94	-0.11	0.99	-0.45	3	1.06	1.12	1.69
